# Supplementary material
Source: PubMed Central journal article supplement (PMC4825147)
Supplement: supp_pp.15.01913_01913suppfigstbls1and7.pdf [file supp_pp.15.01913_01913suppfigstbls1and7.pdf]

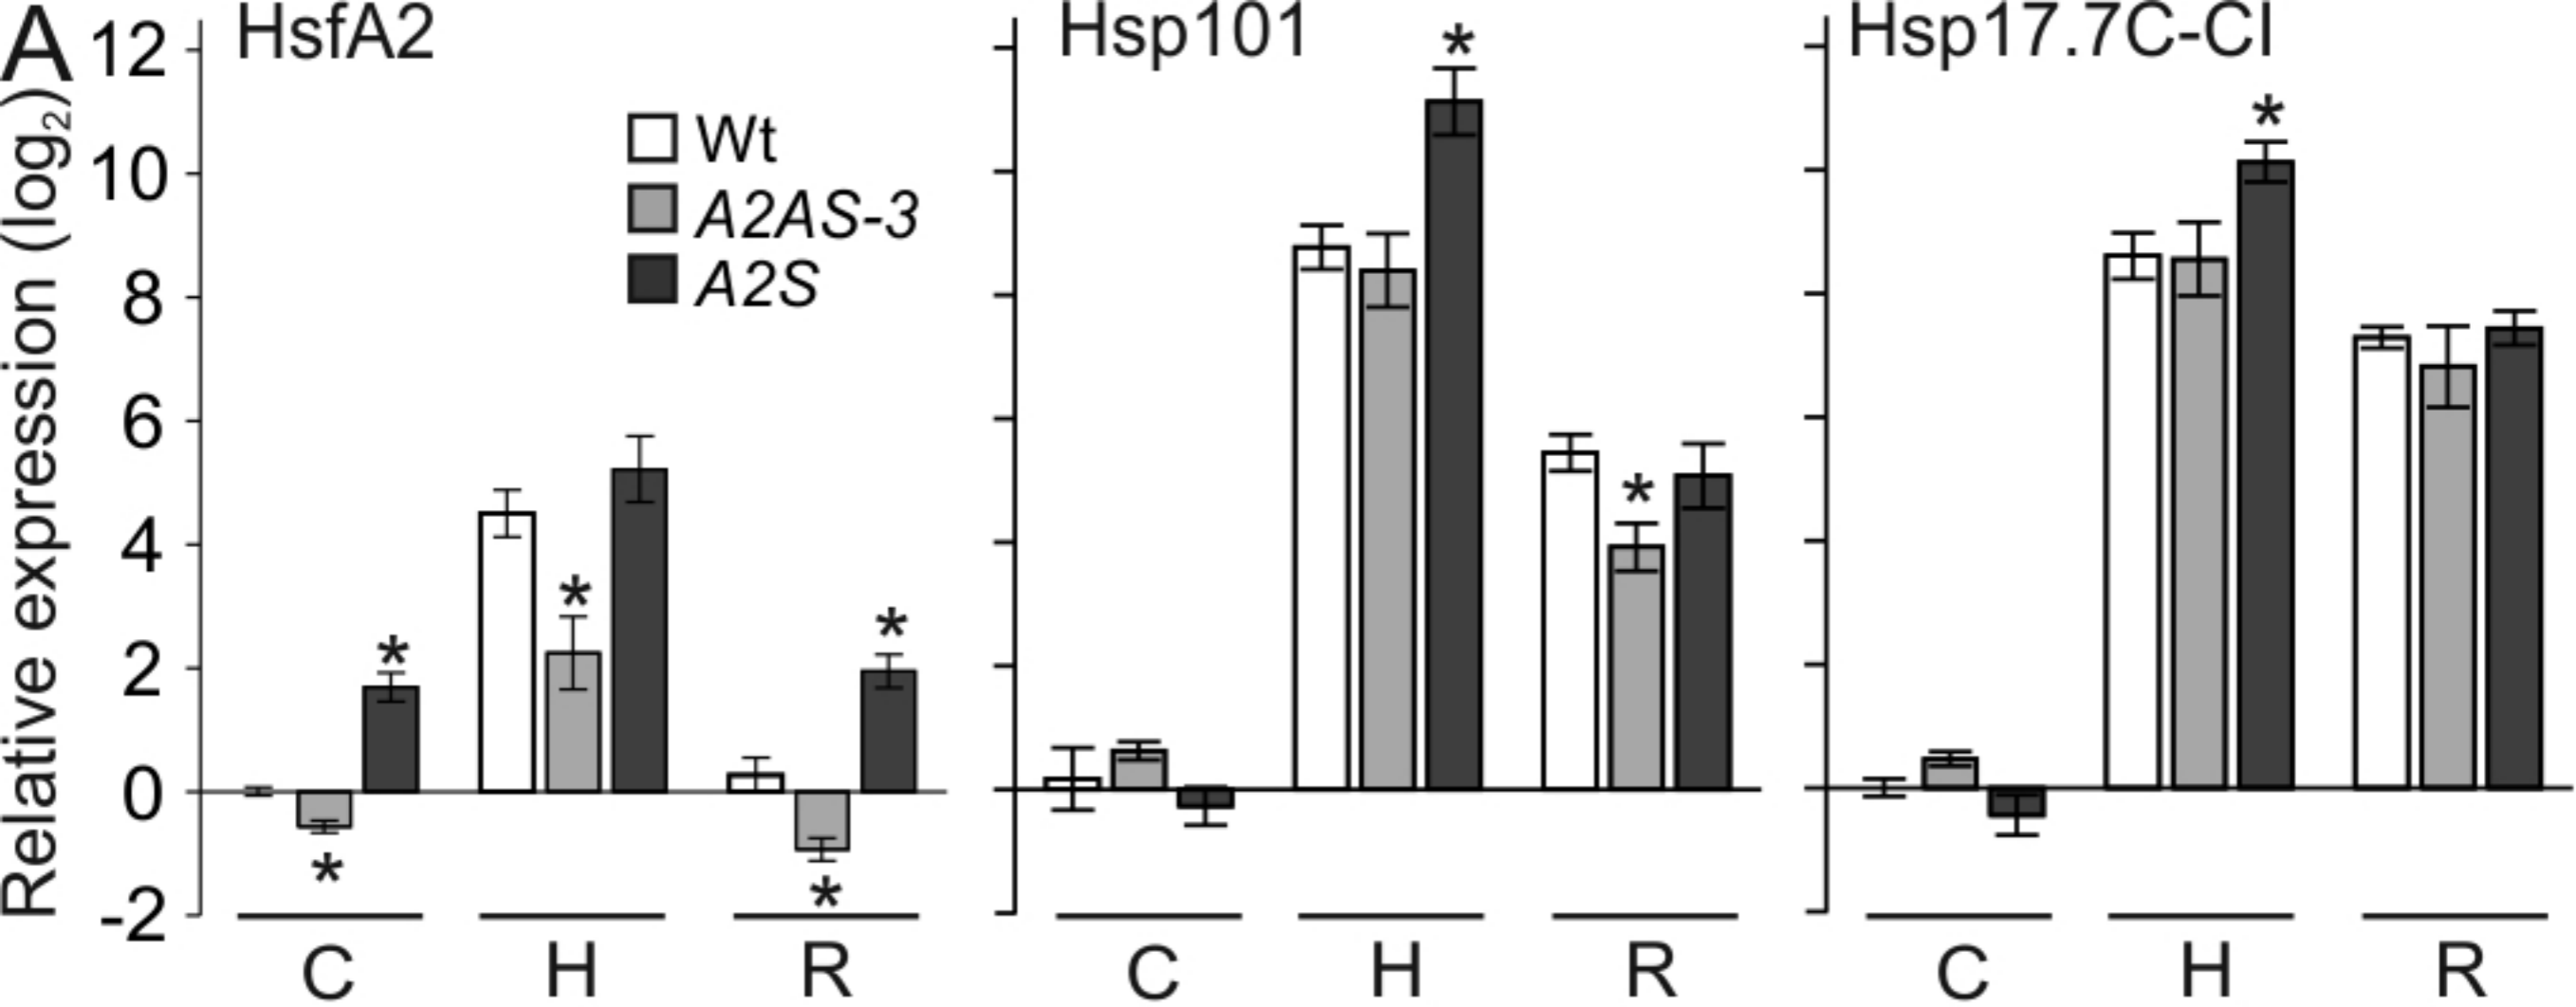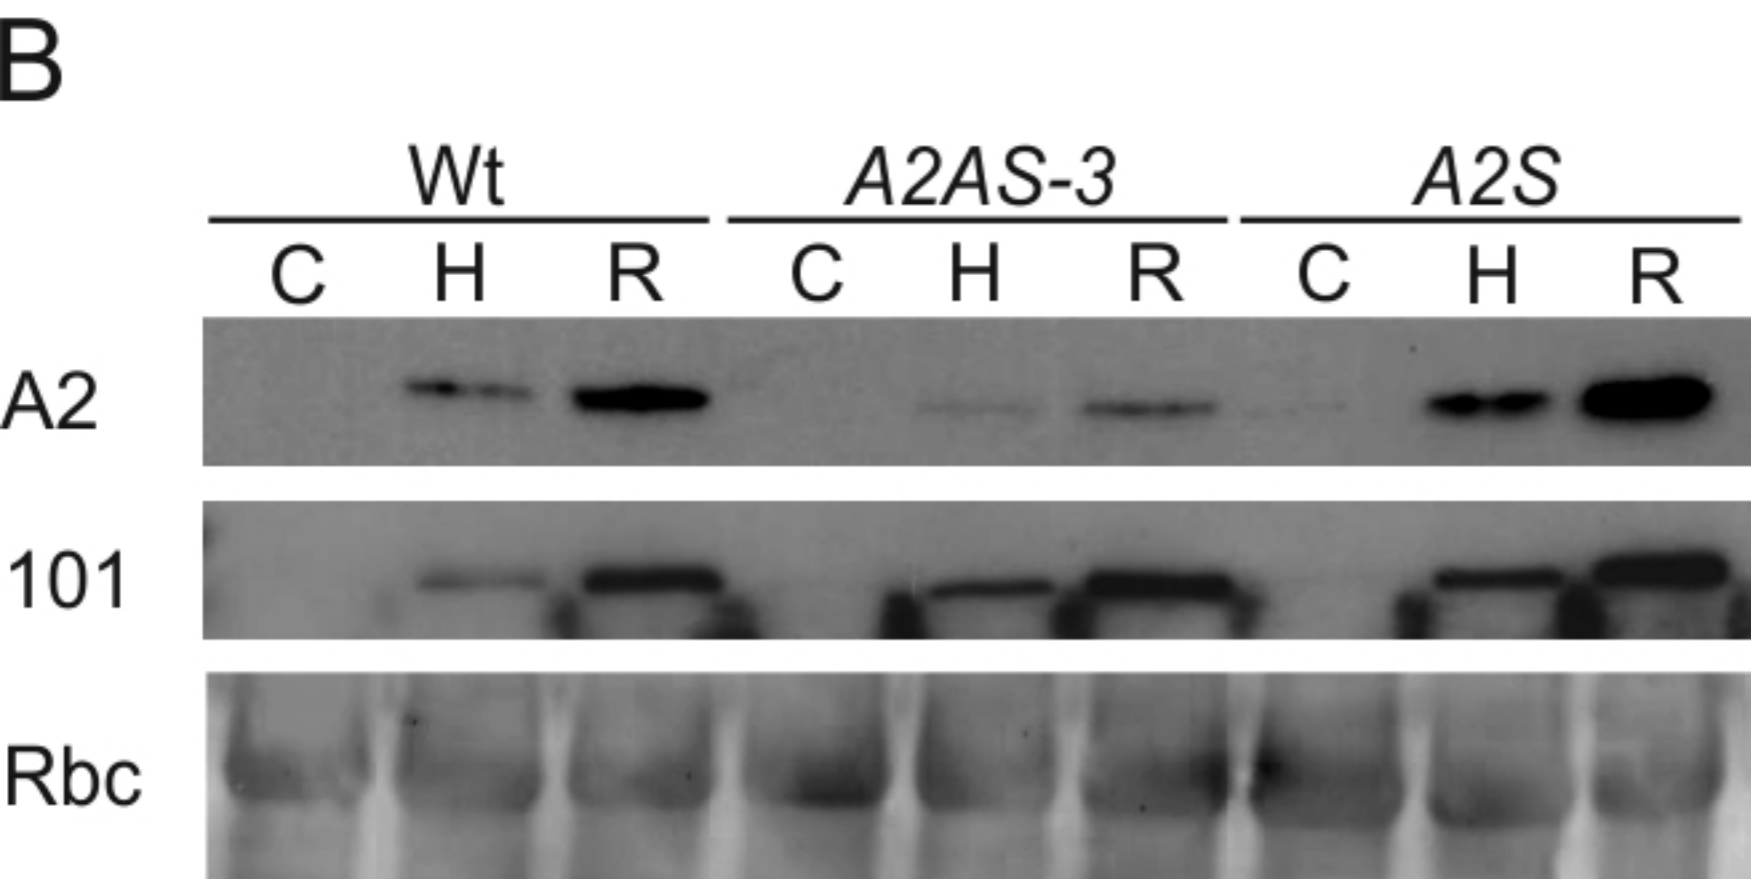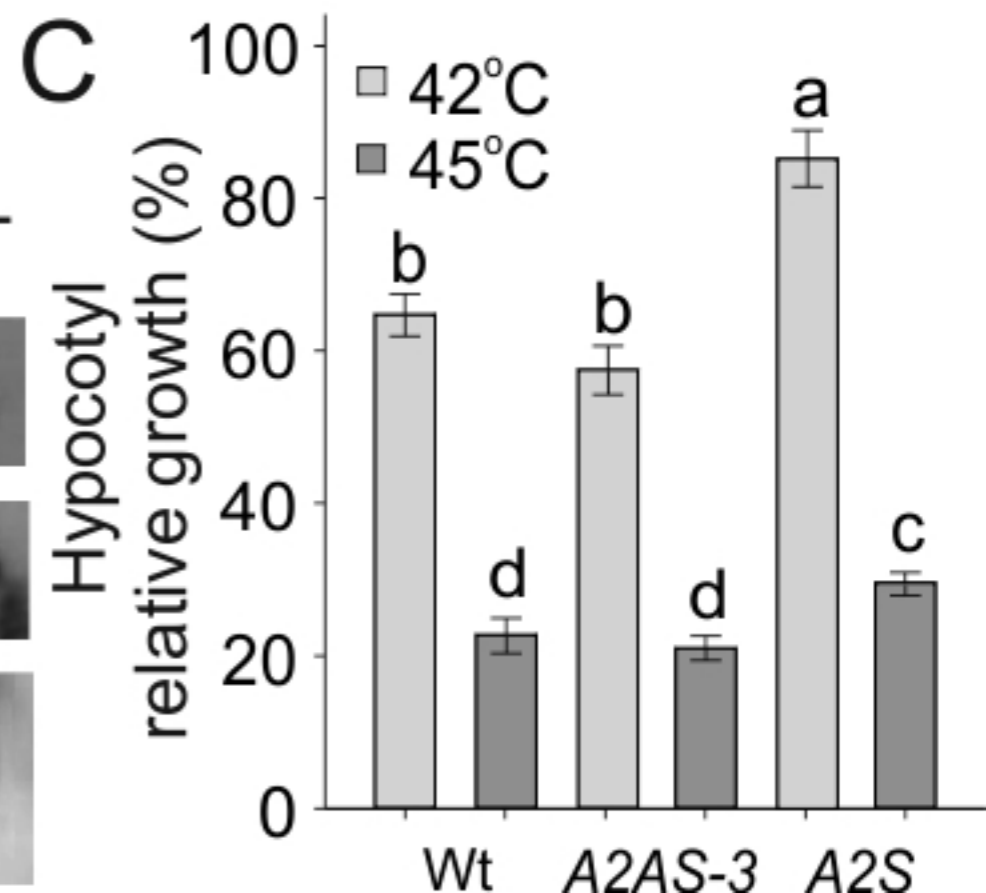

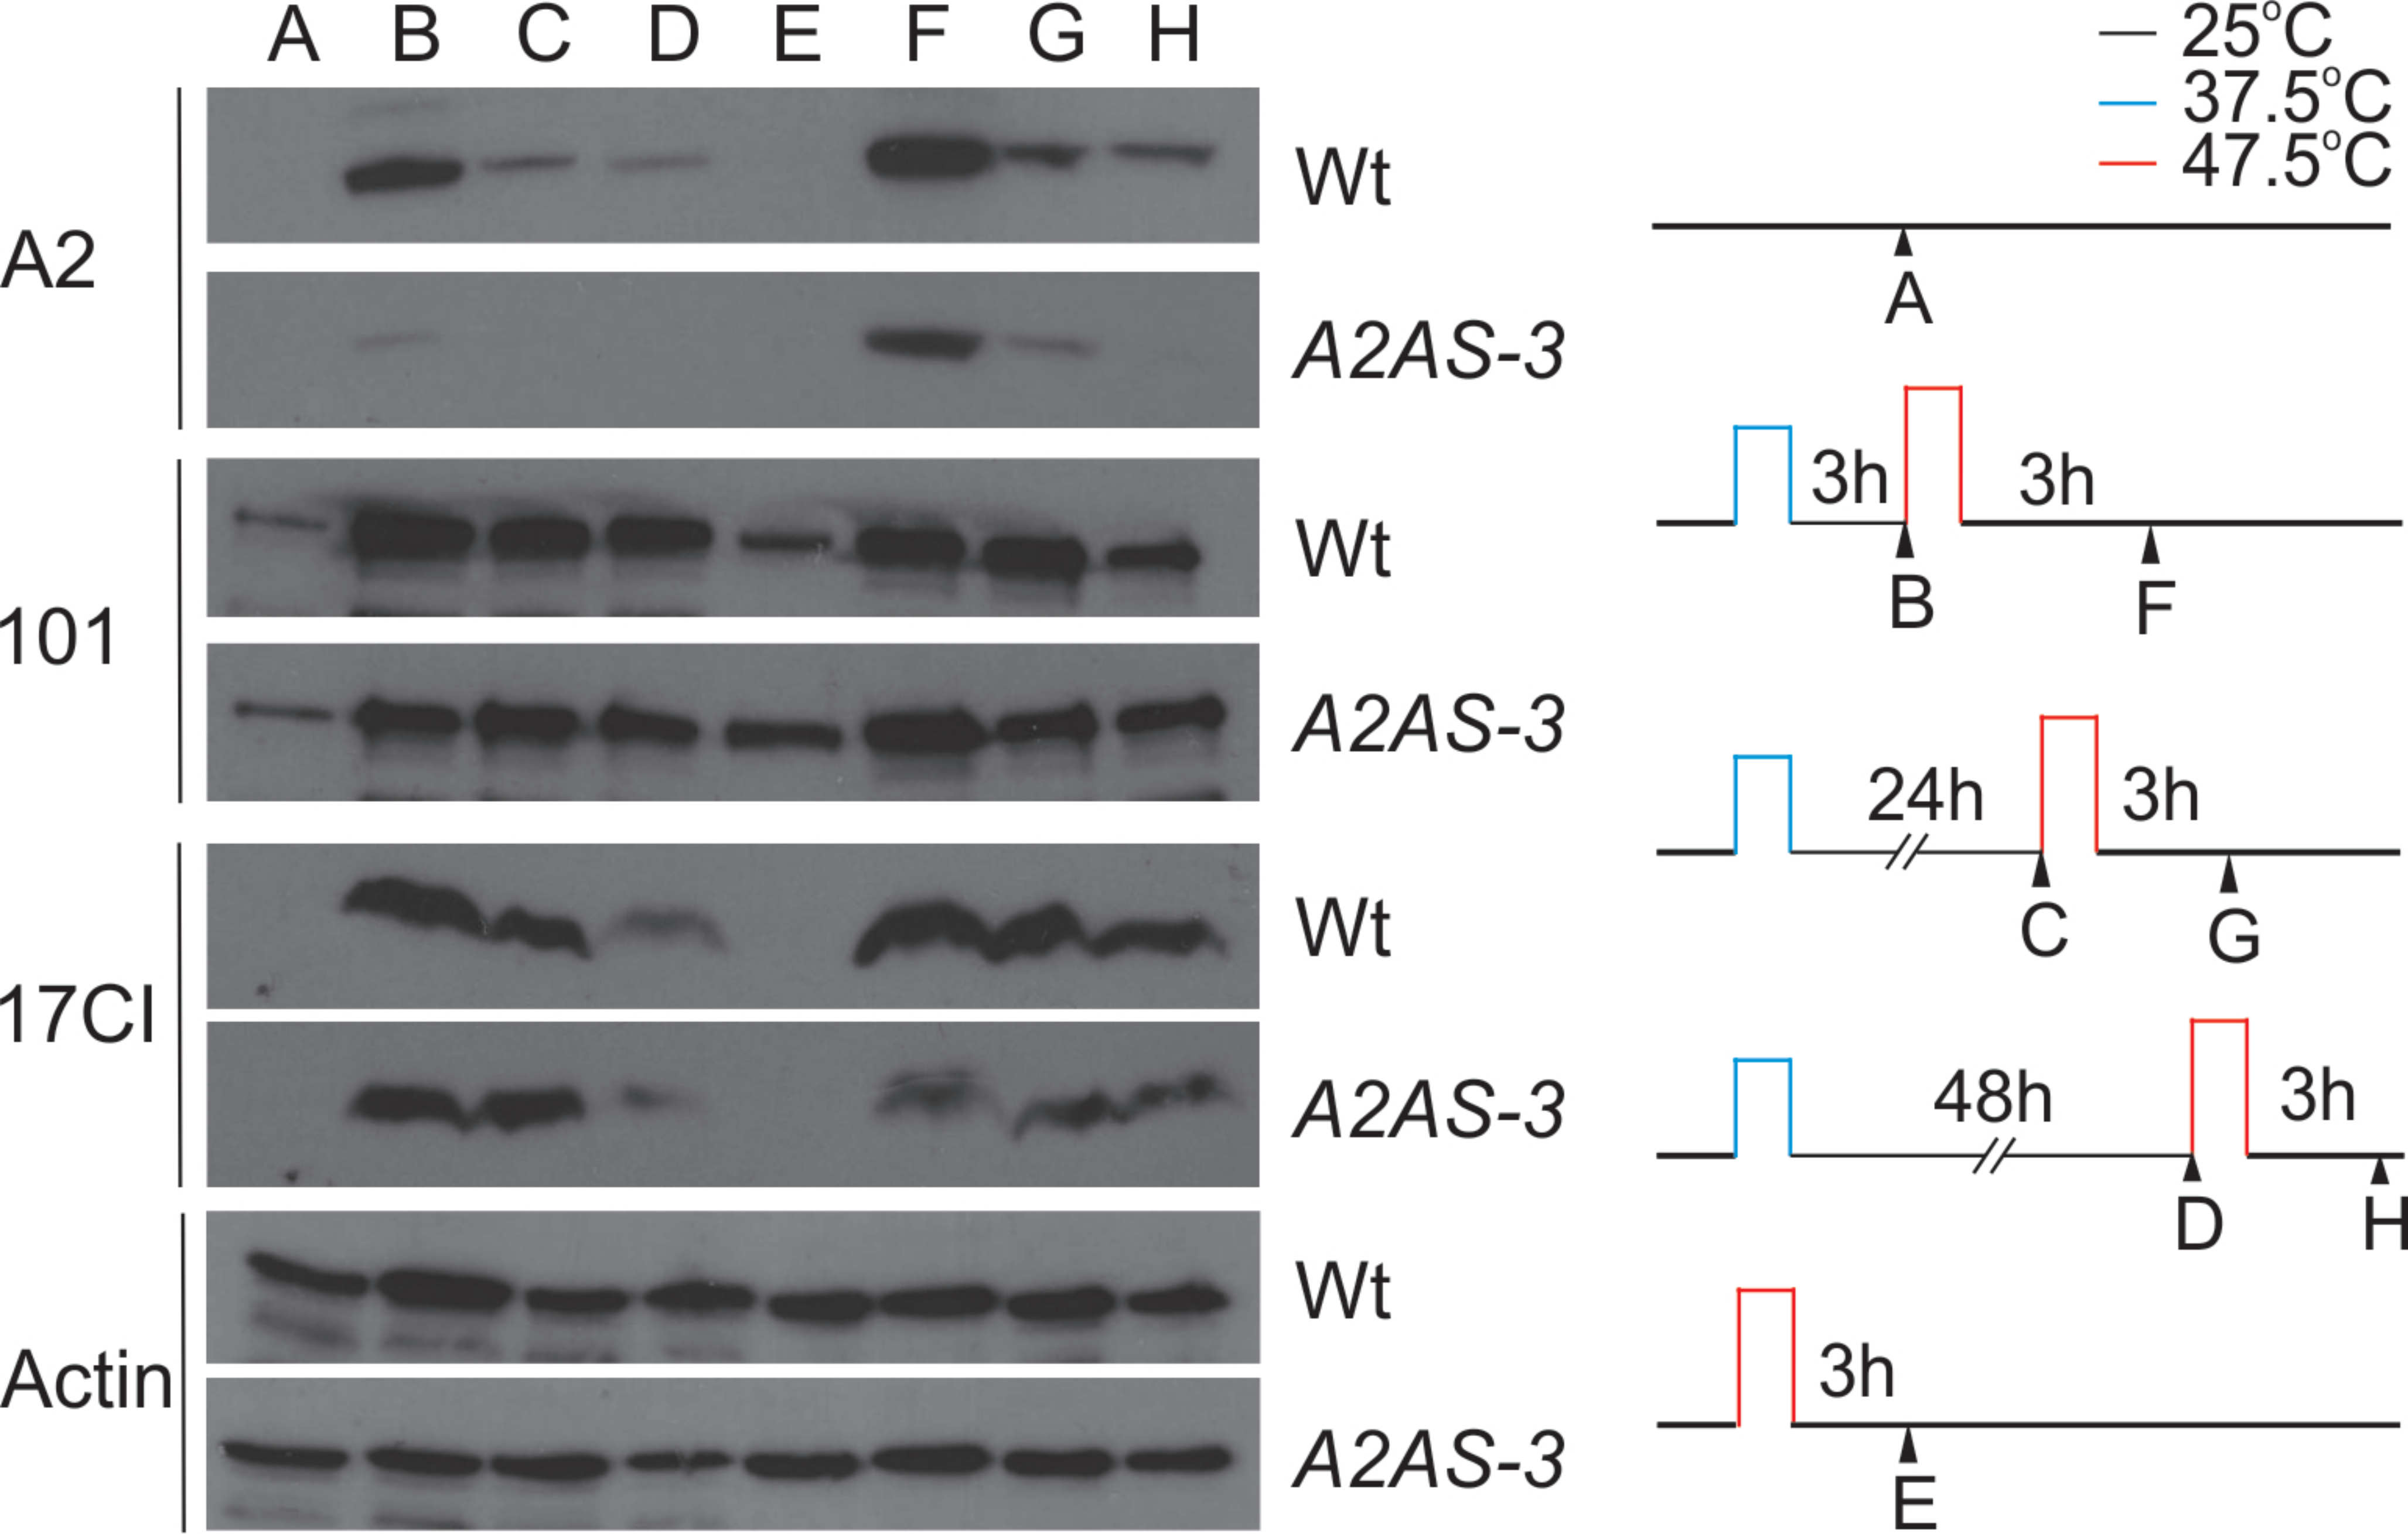

Relative expression

HsfA2

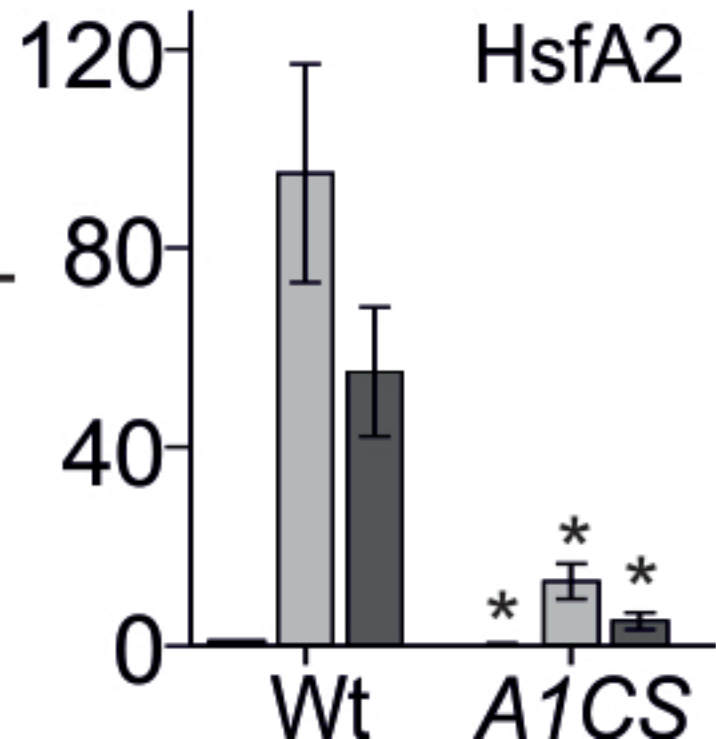

Hsp101

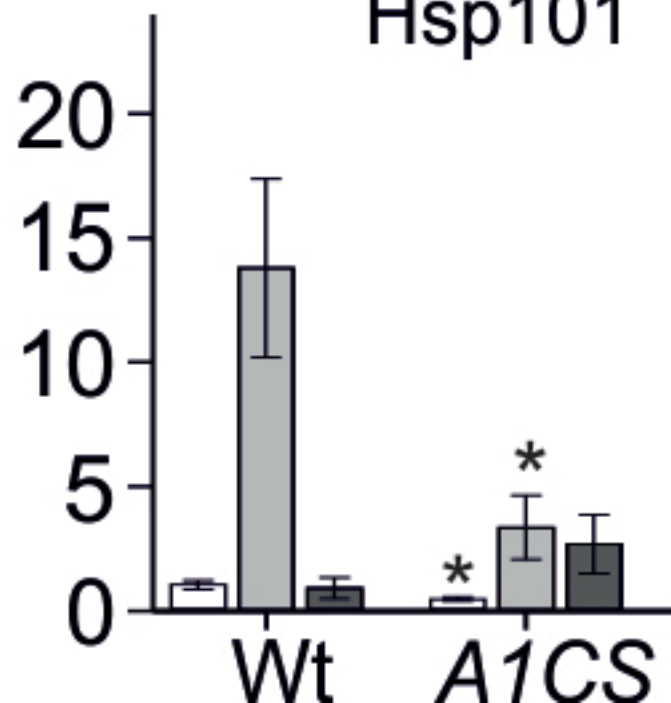

Hsp17.7C-CI

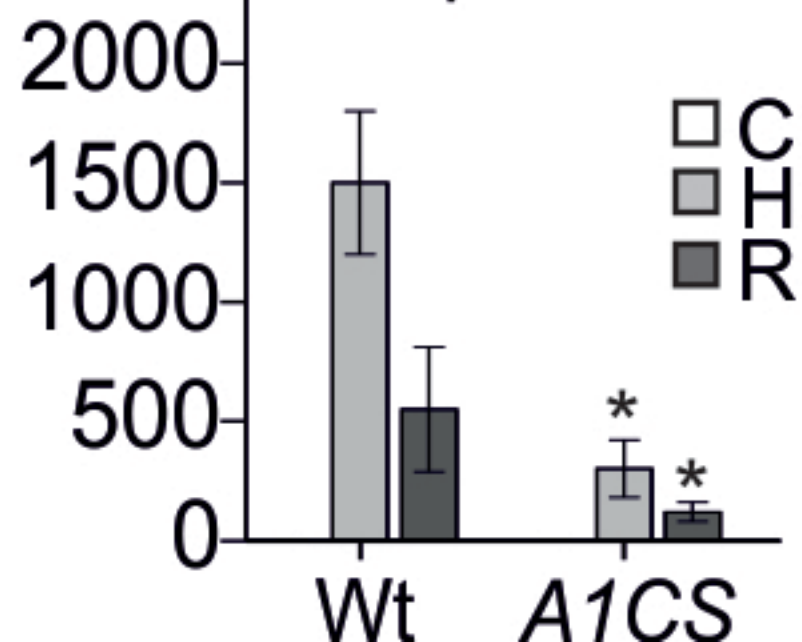

□ C  
■ H  
■ R



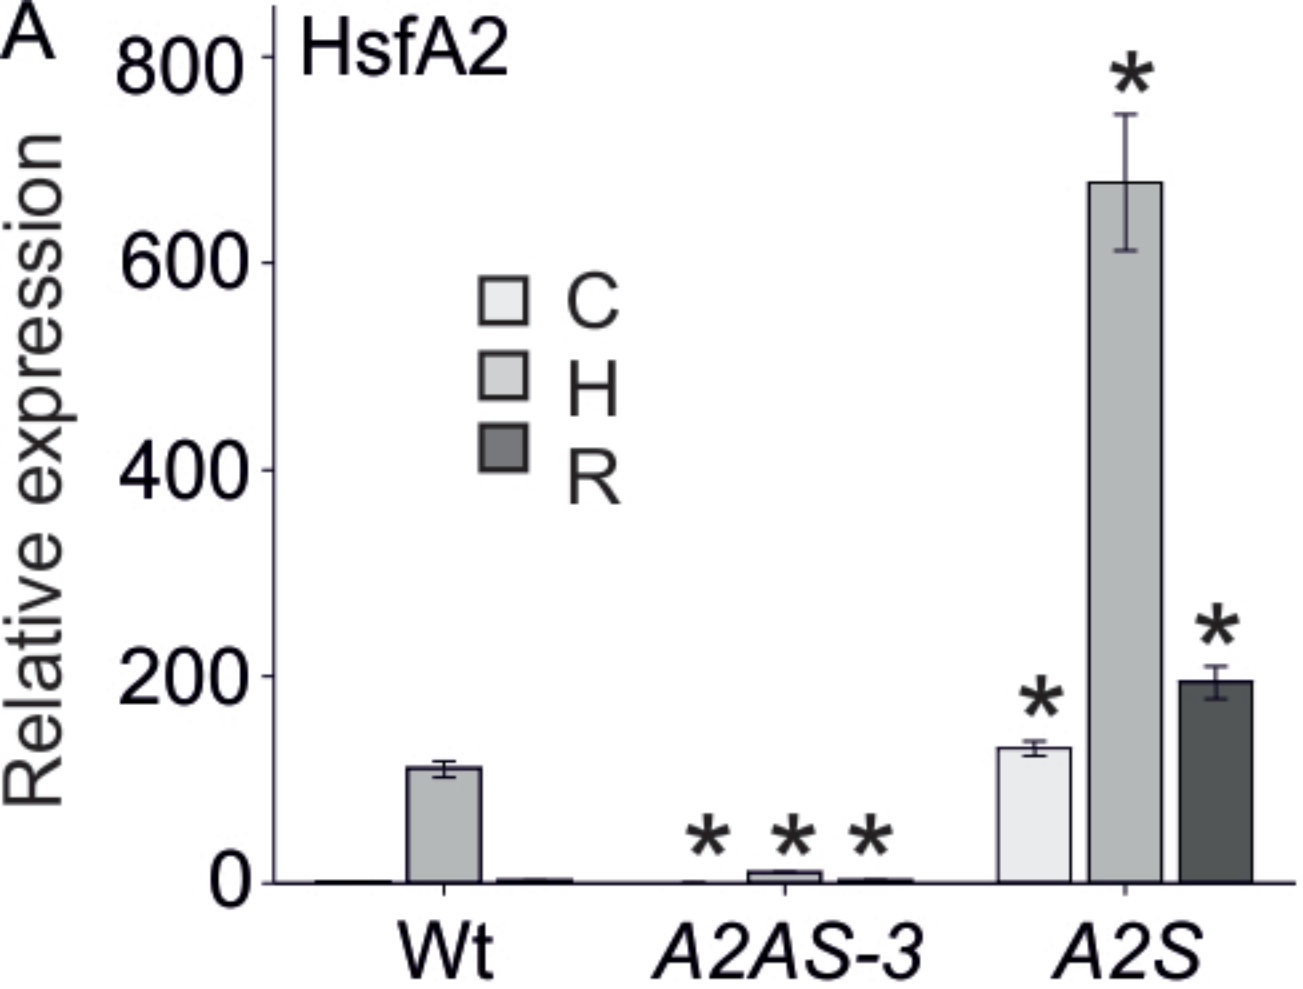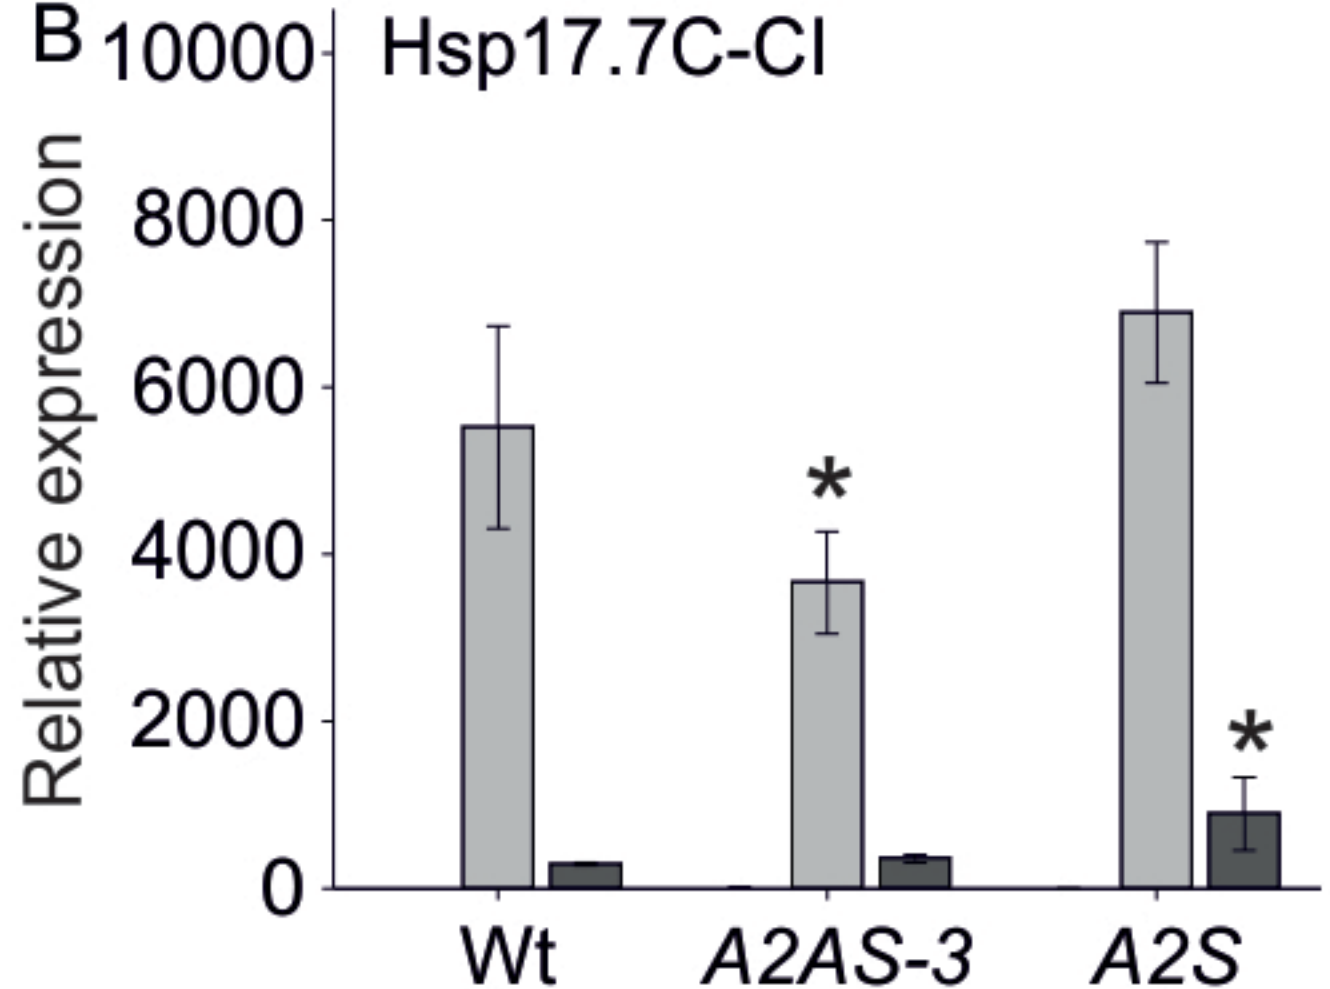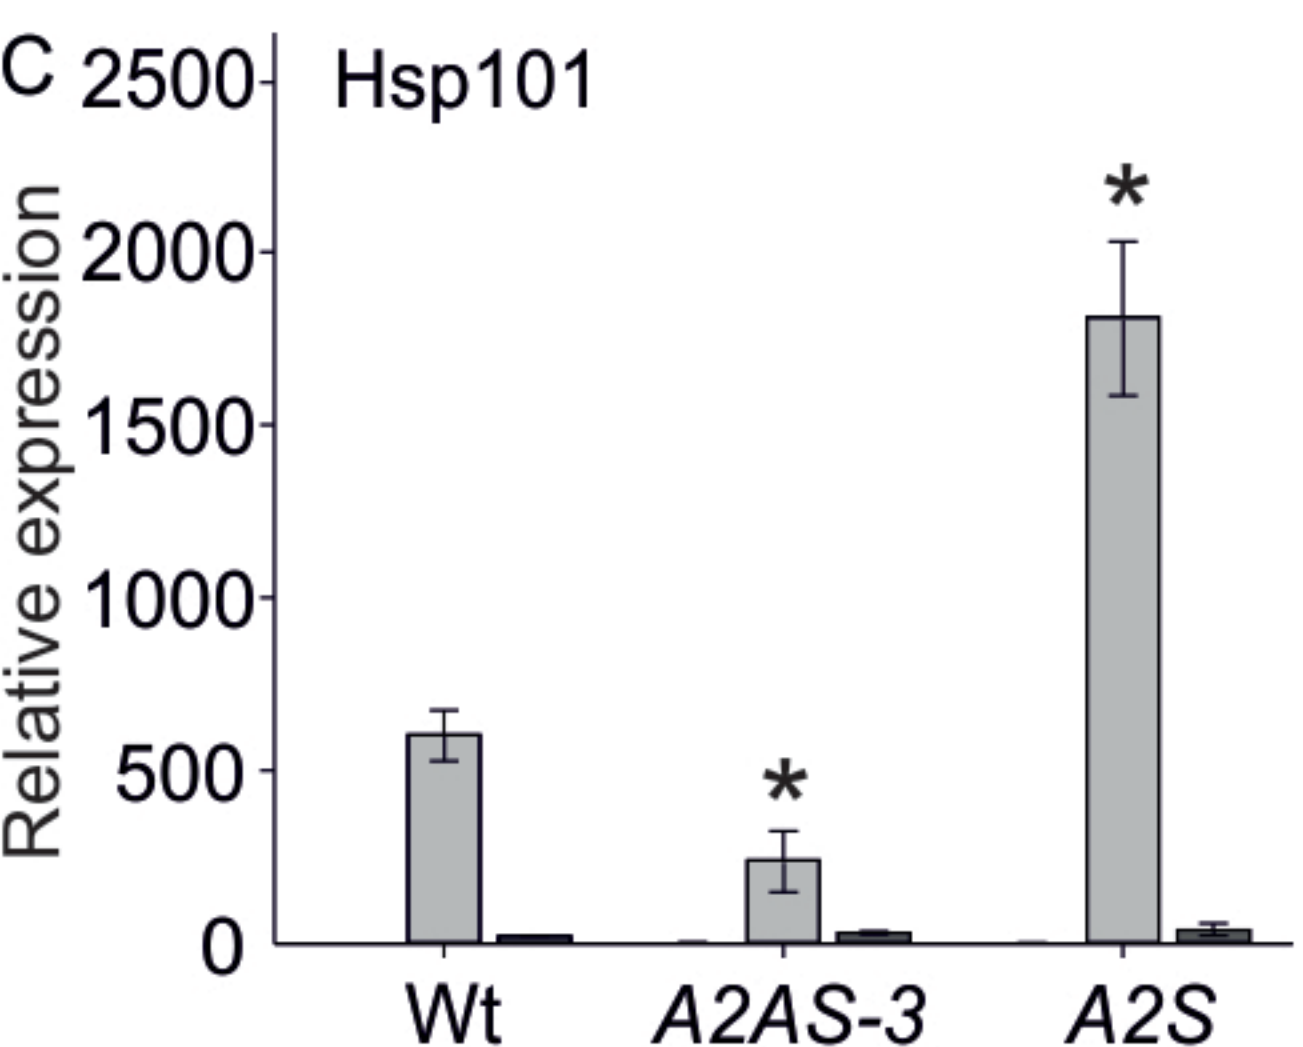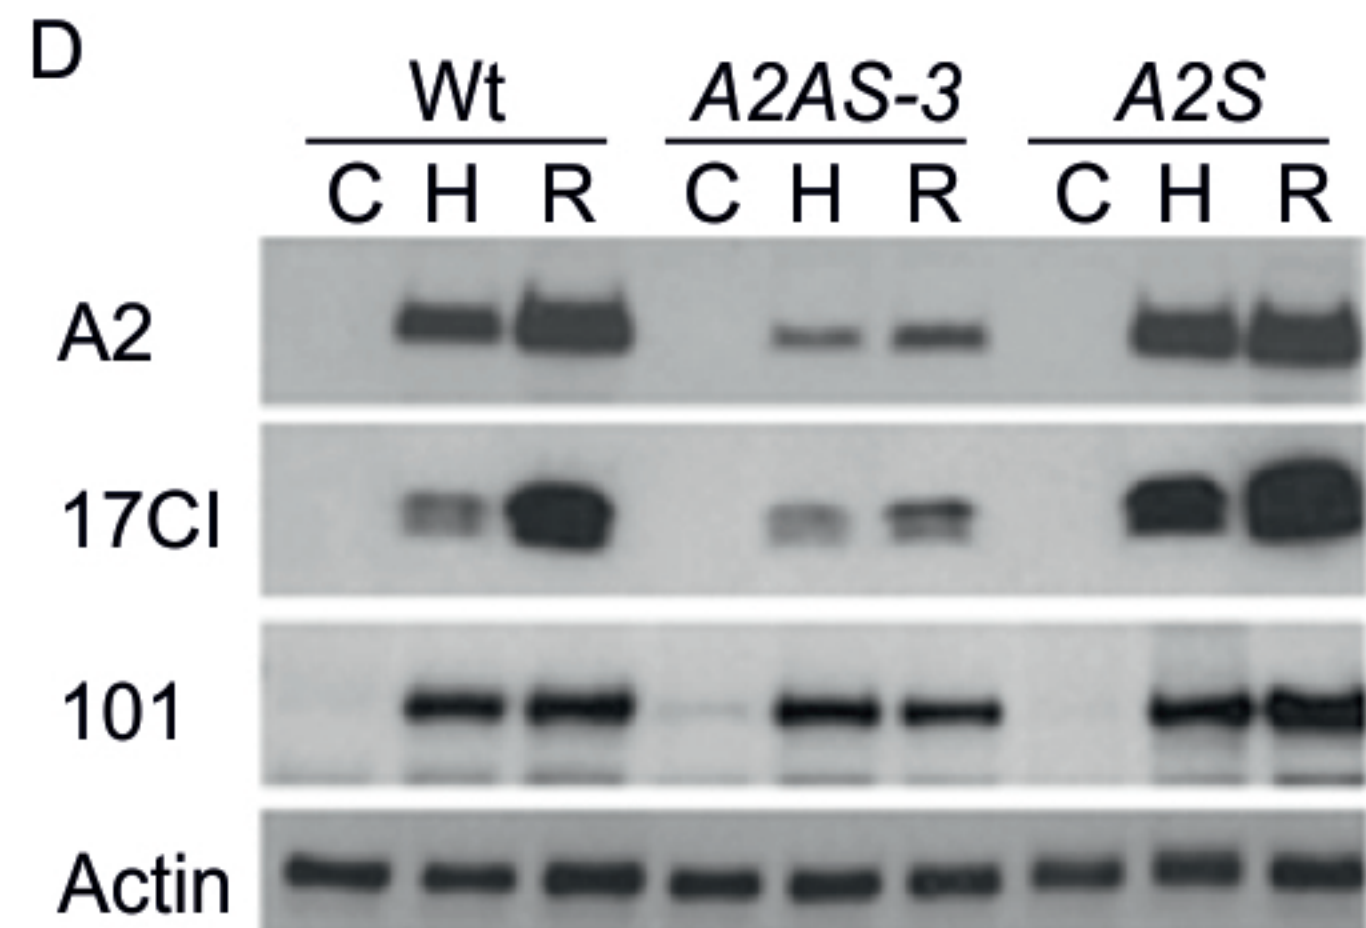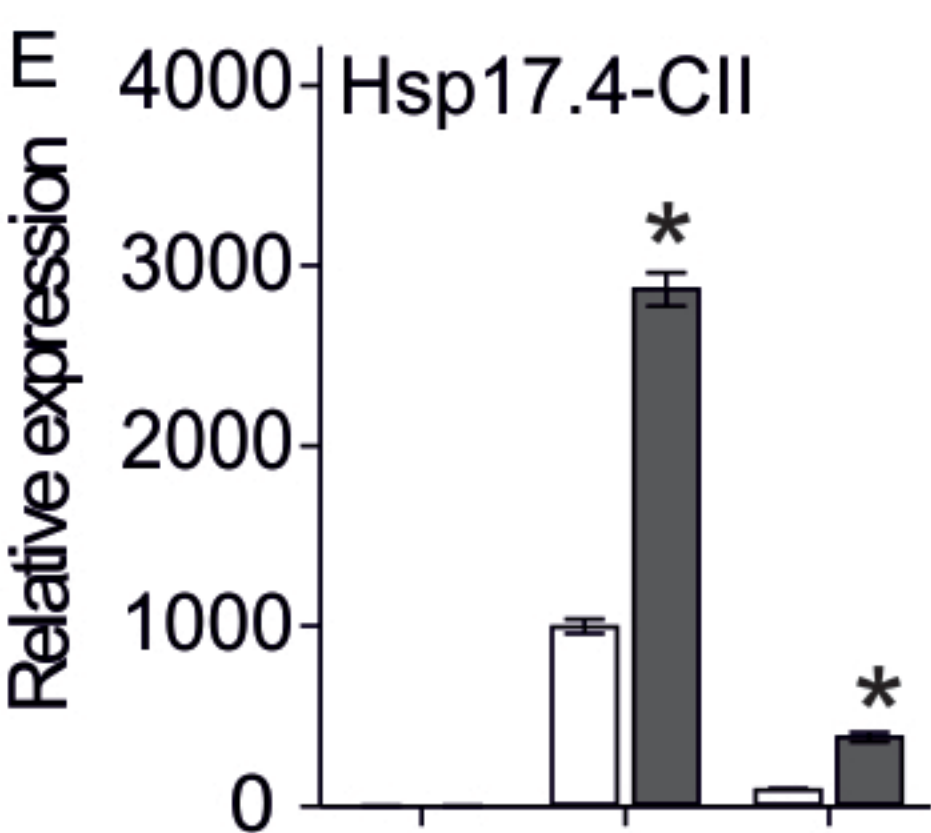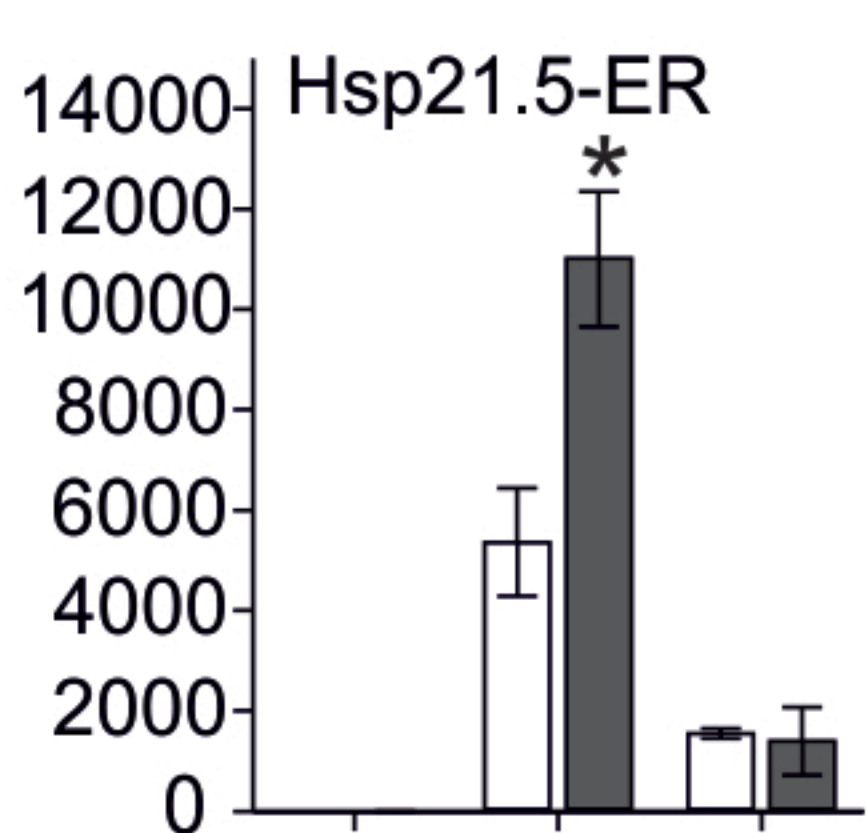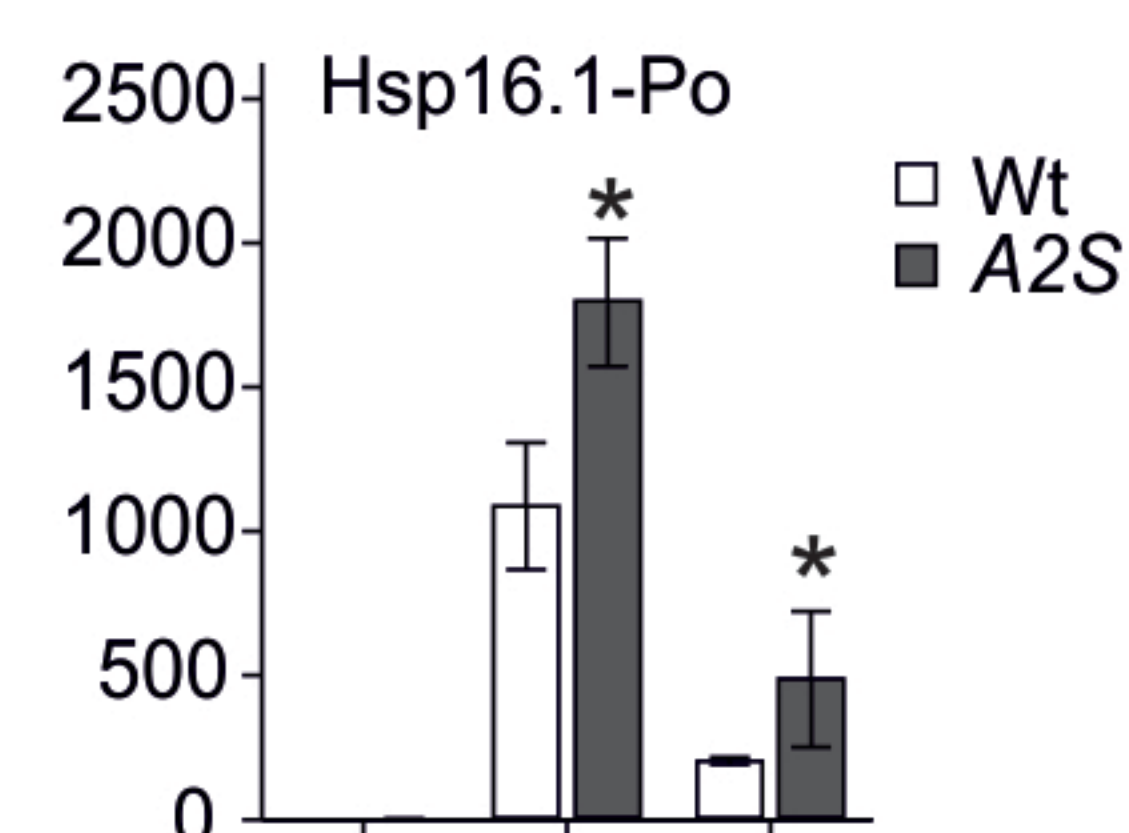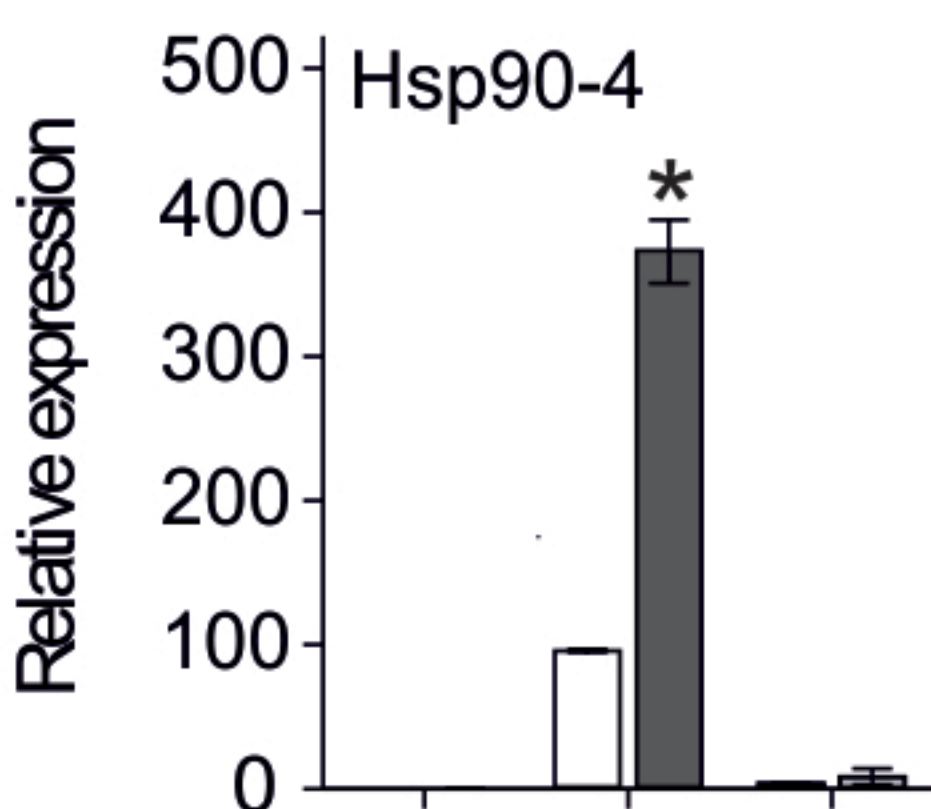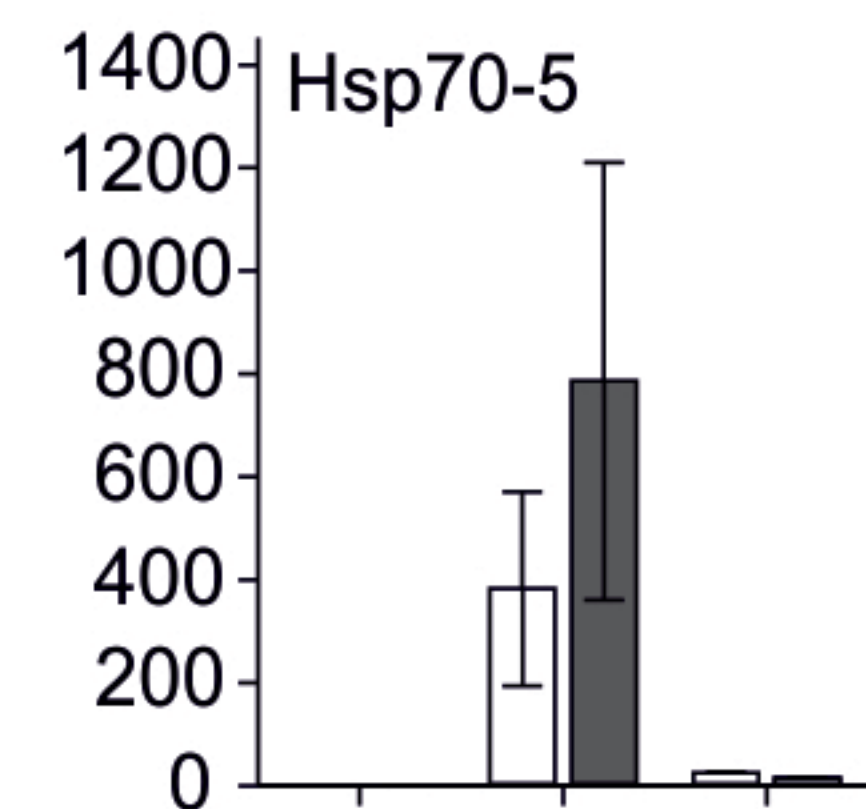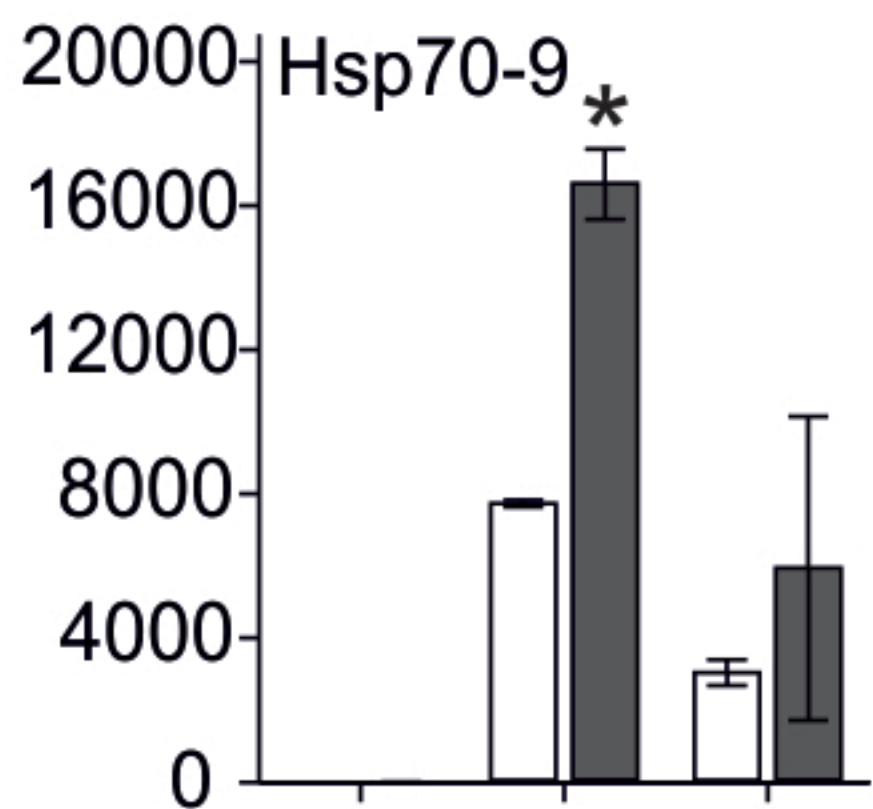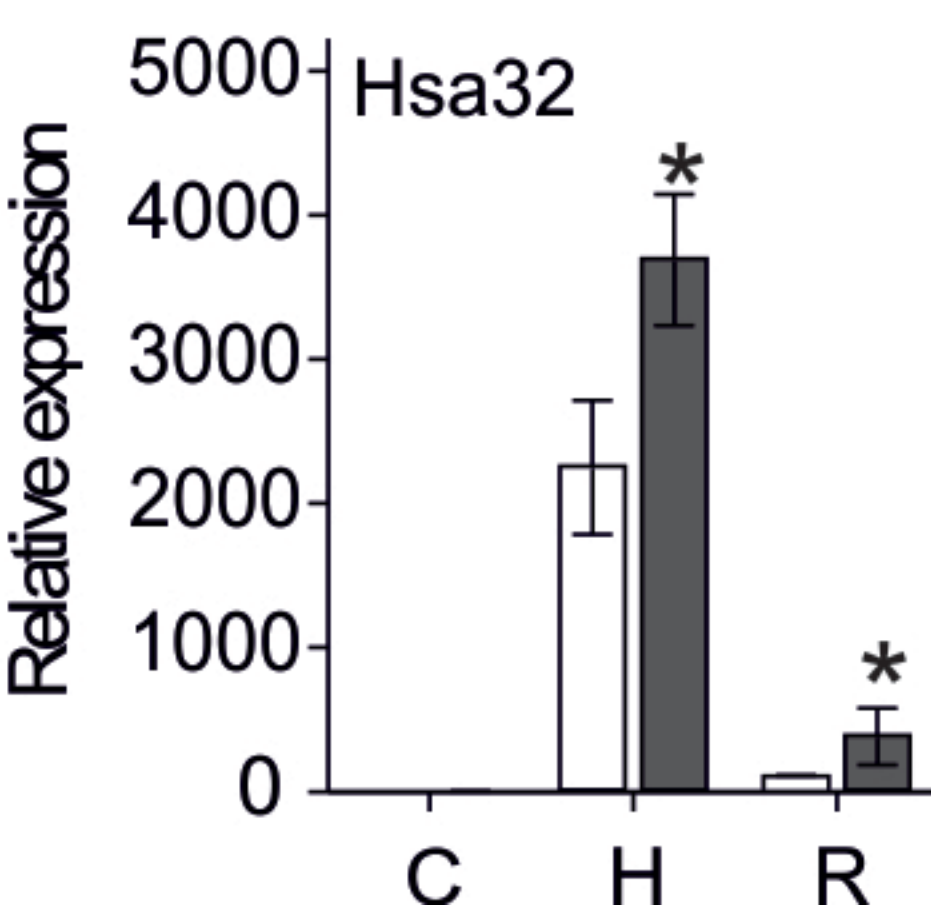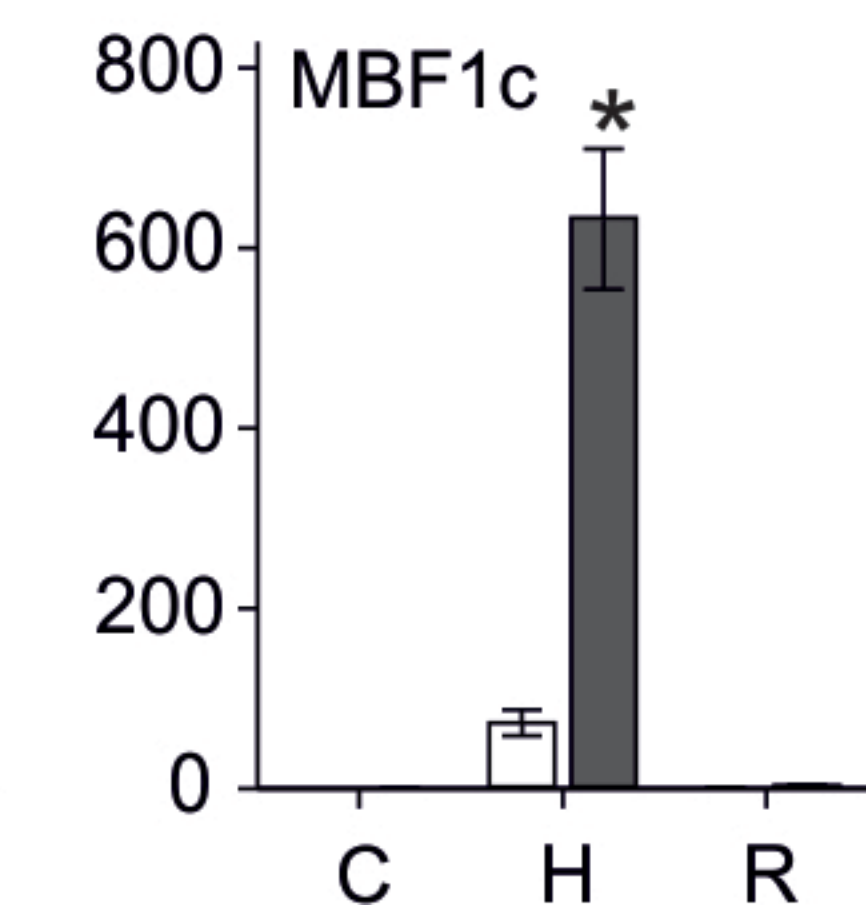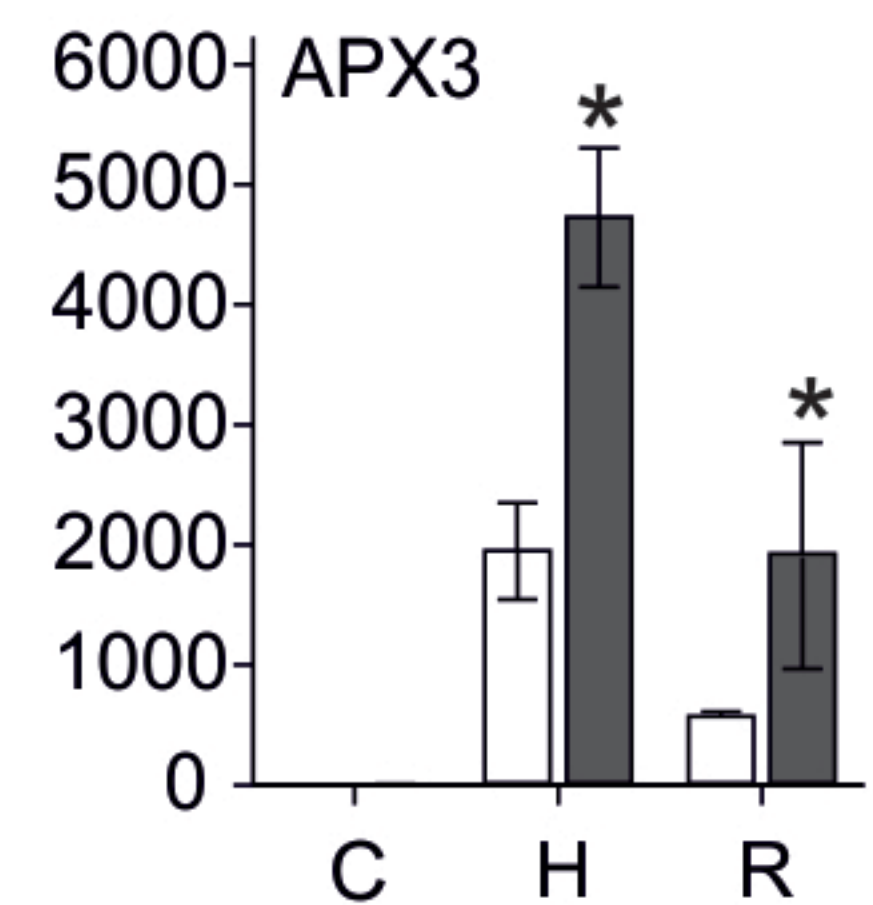



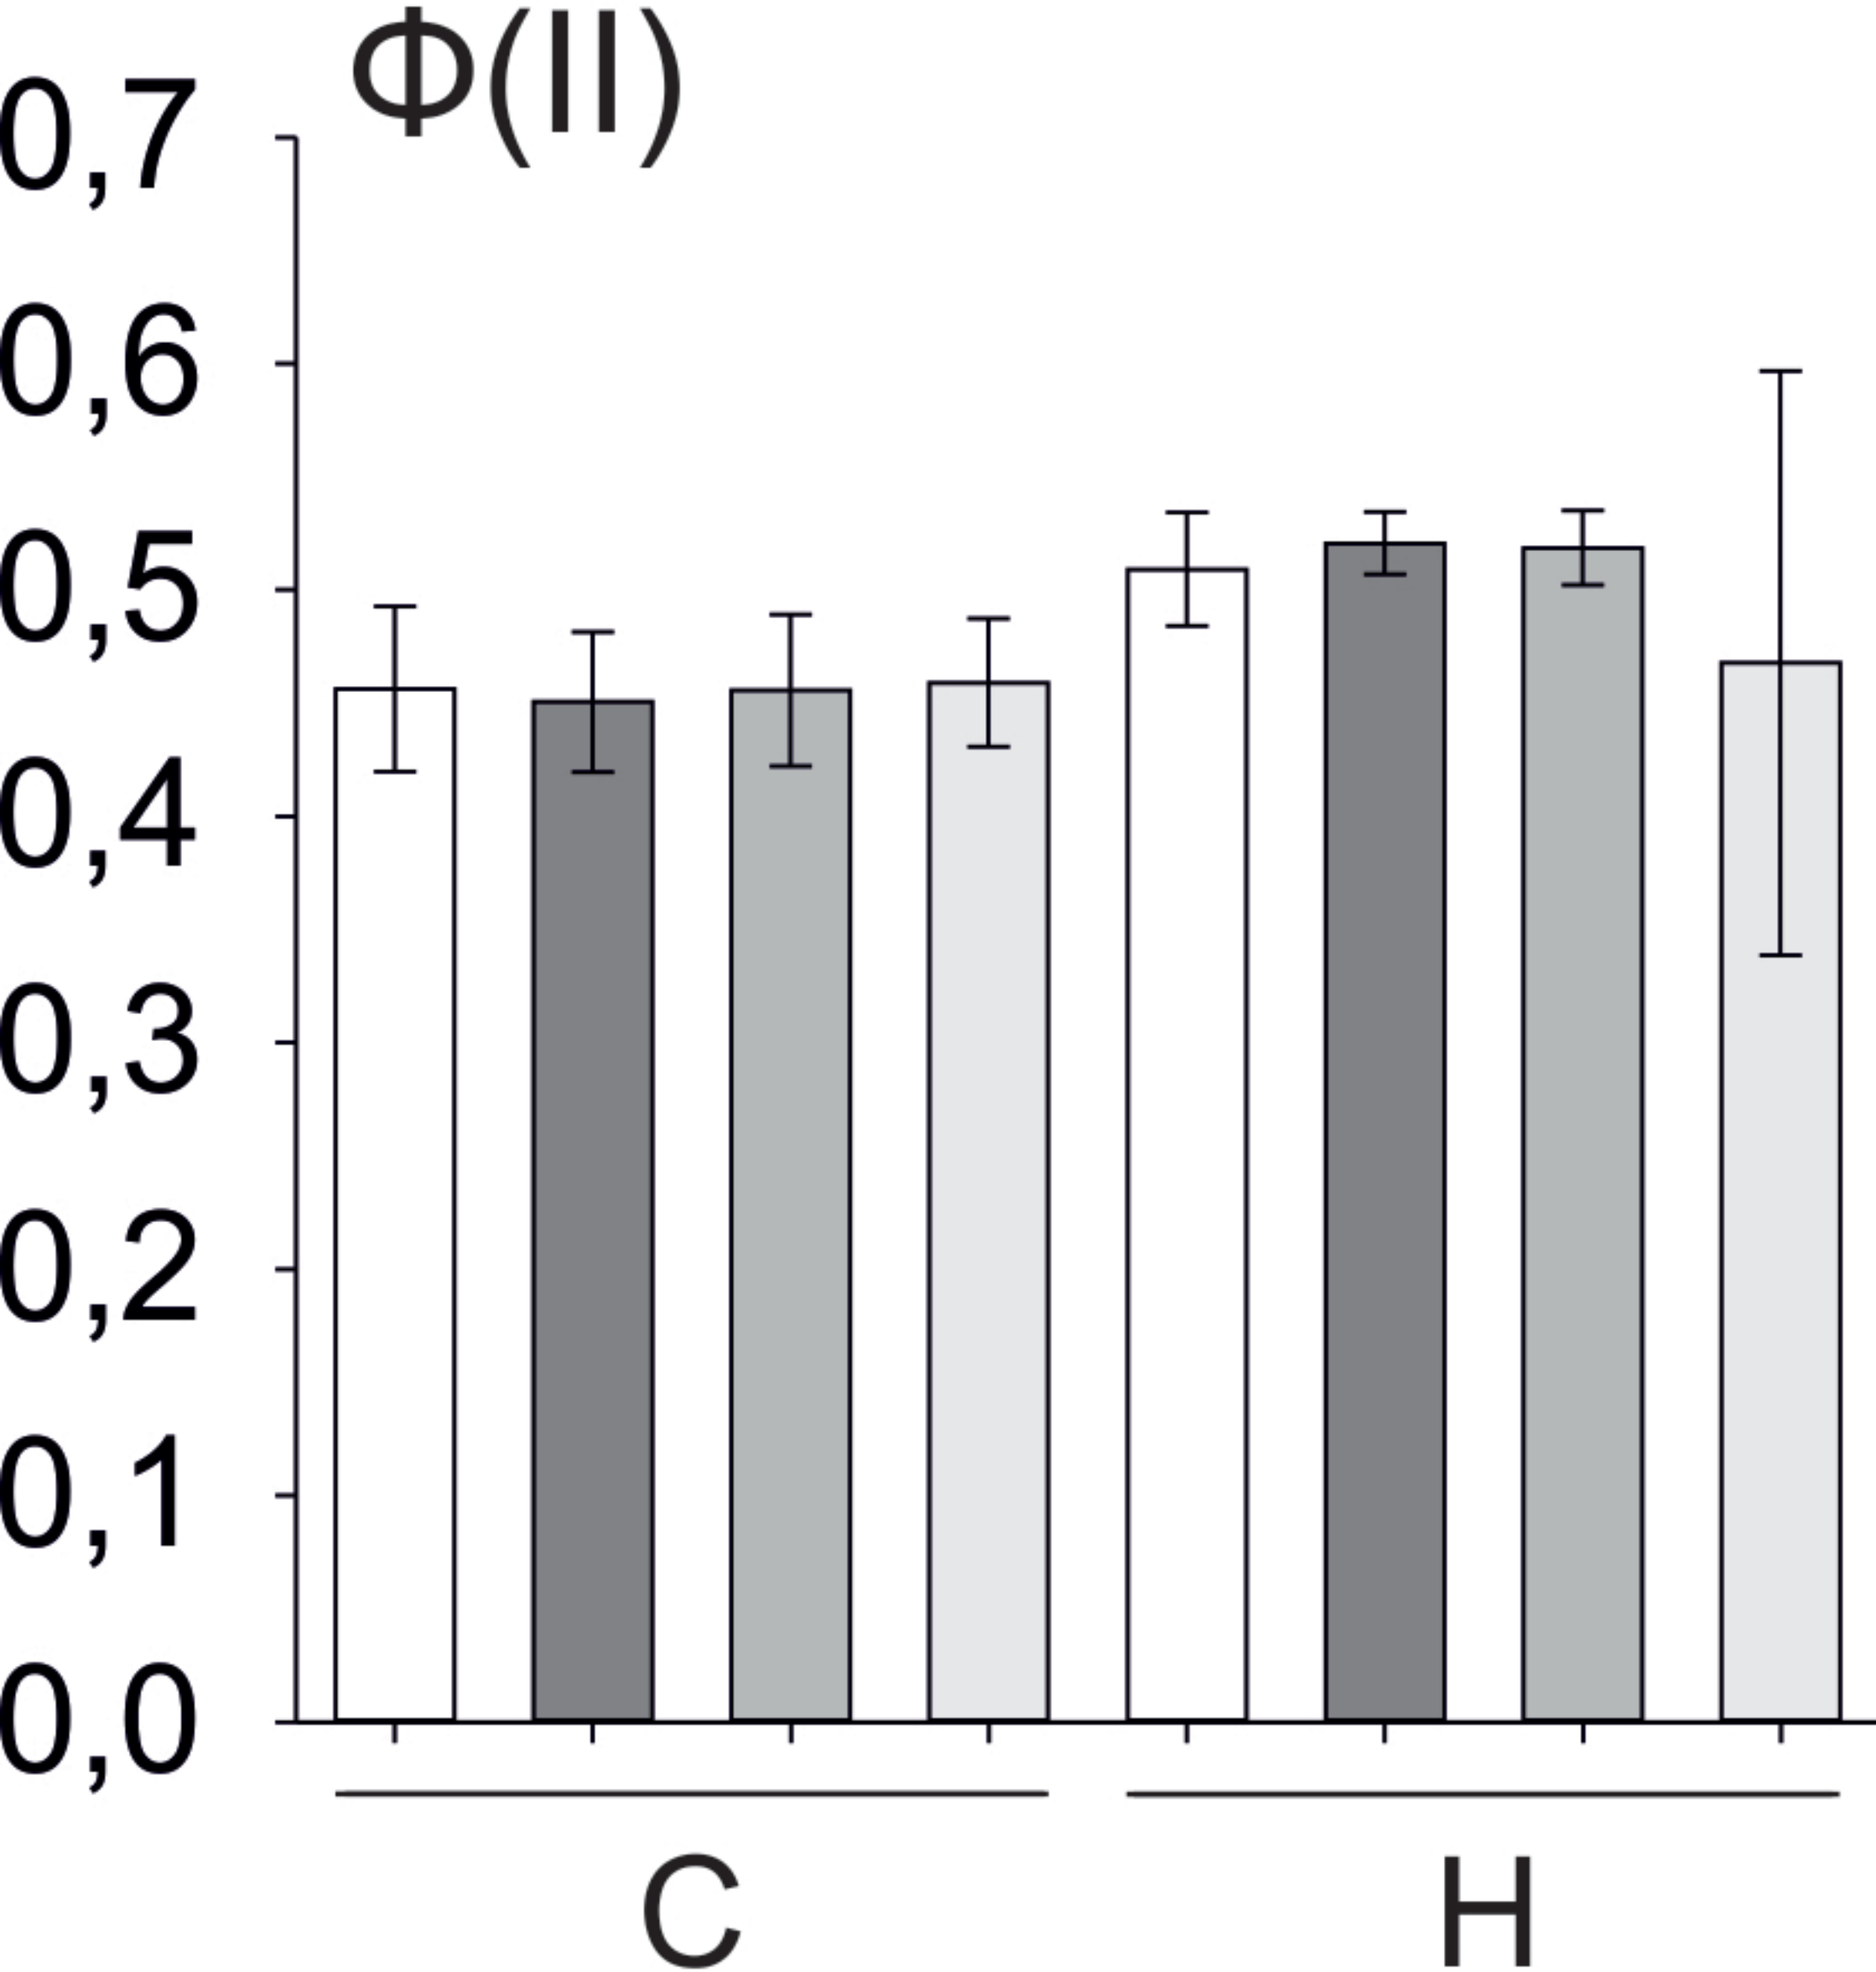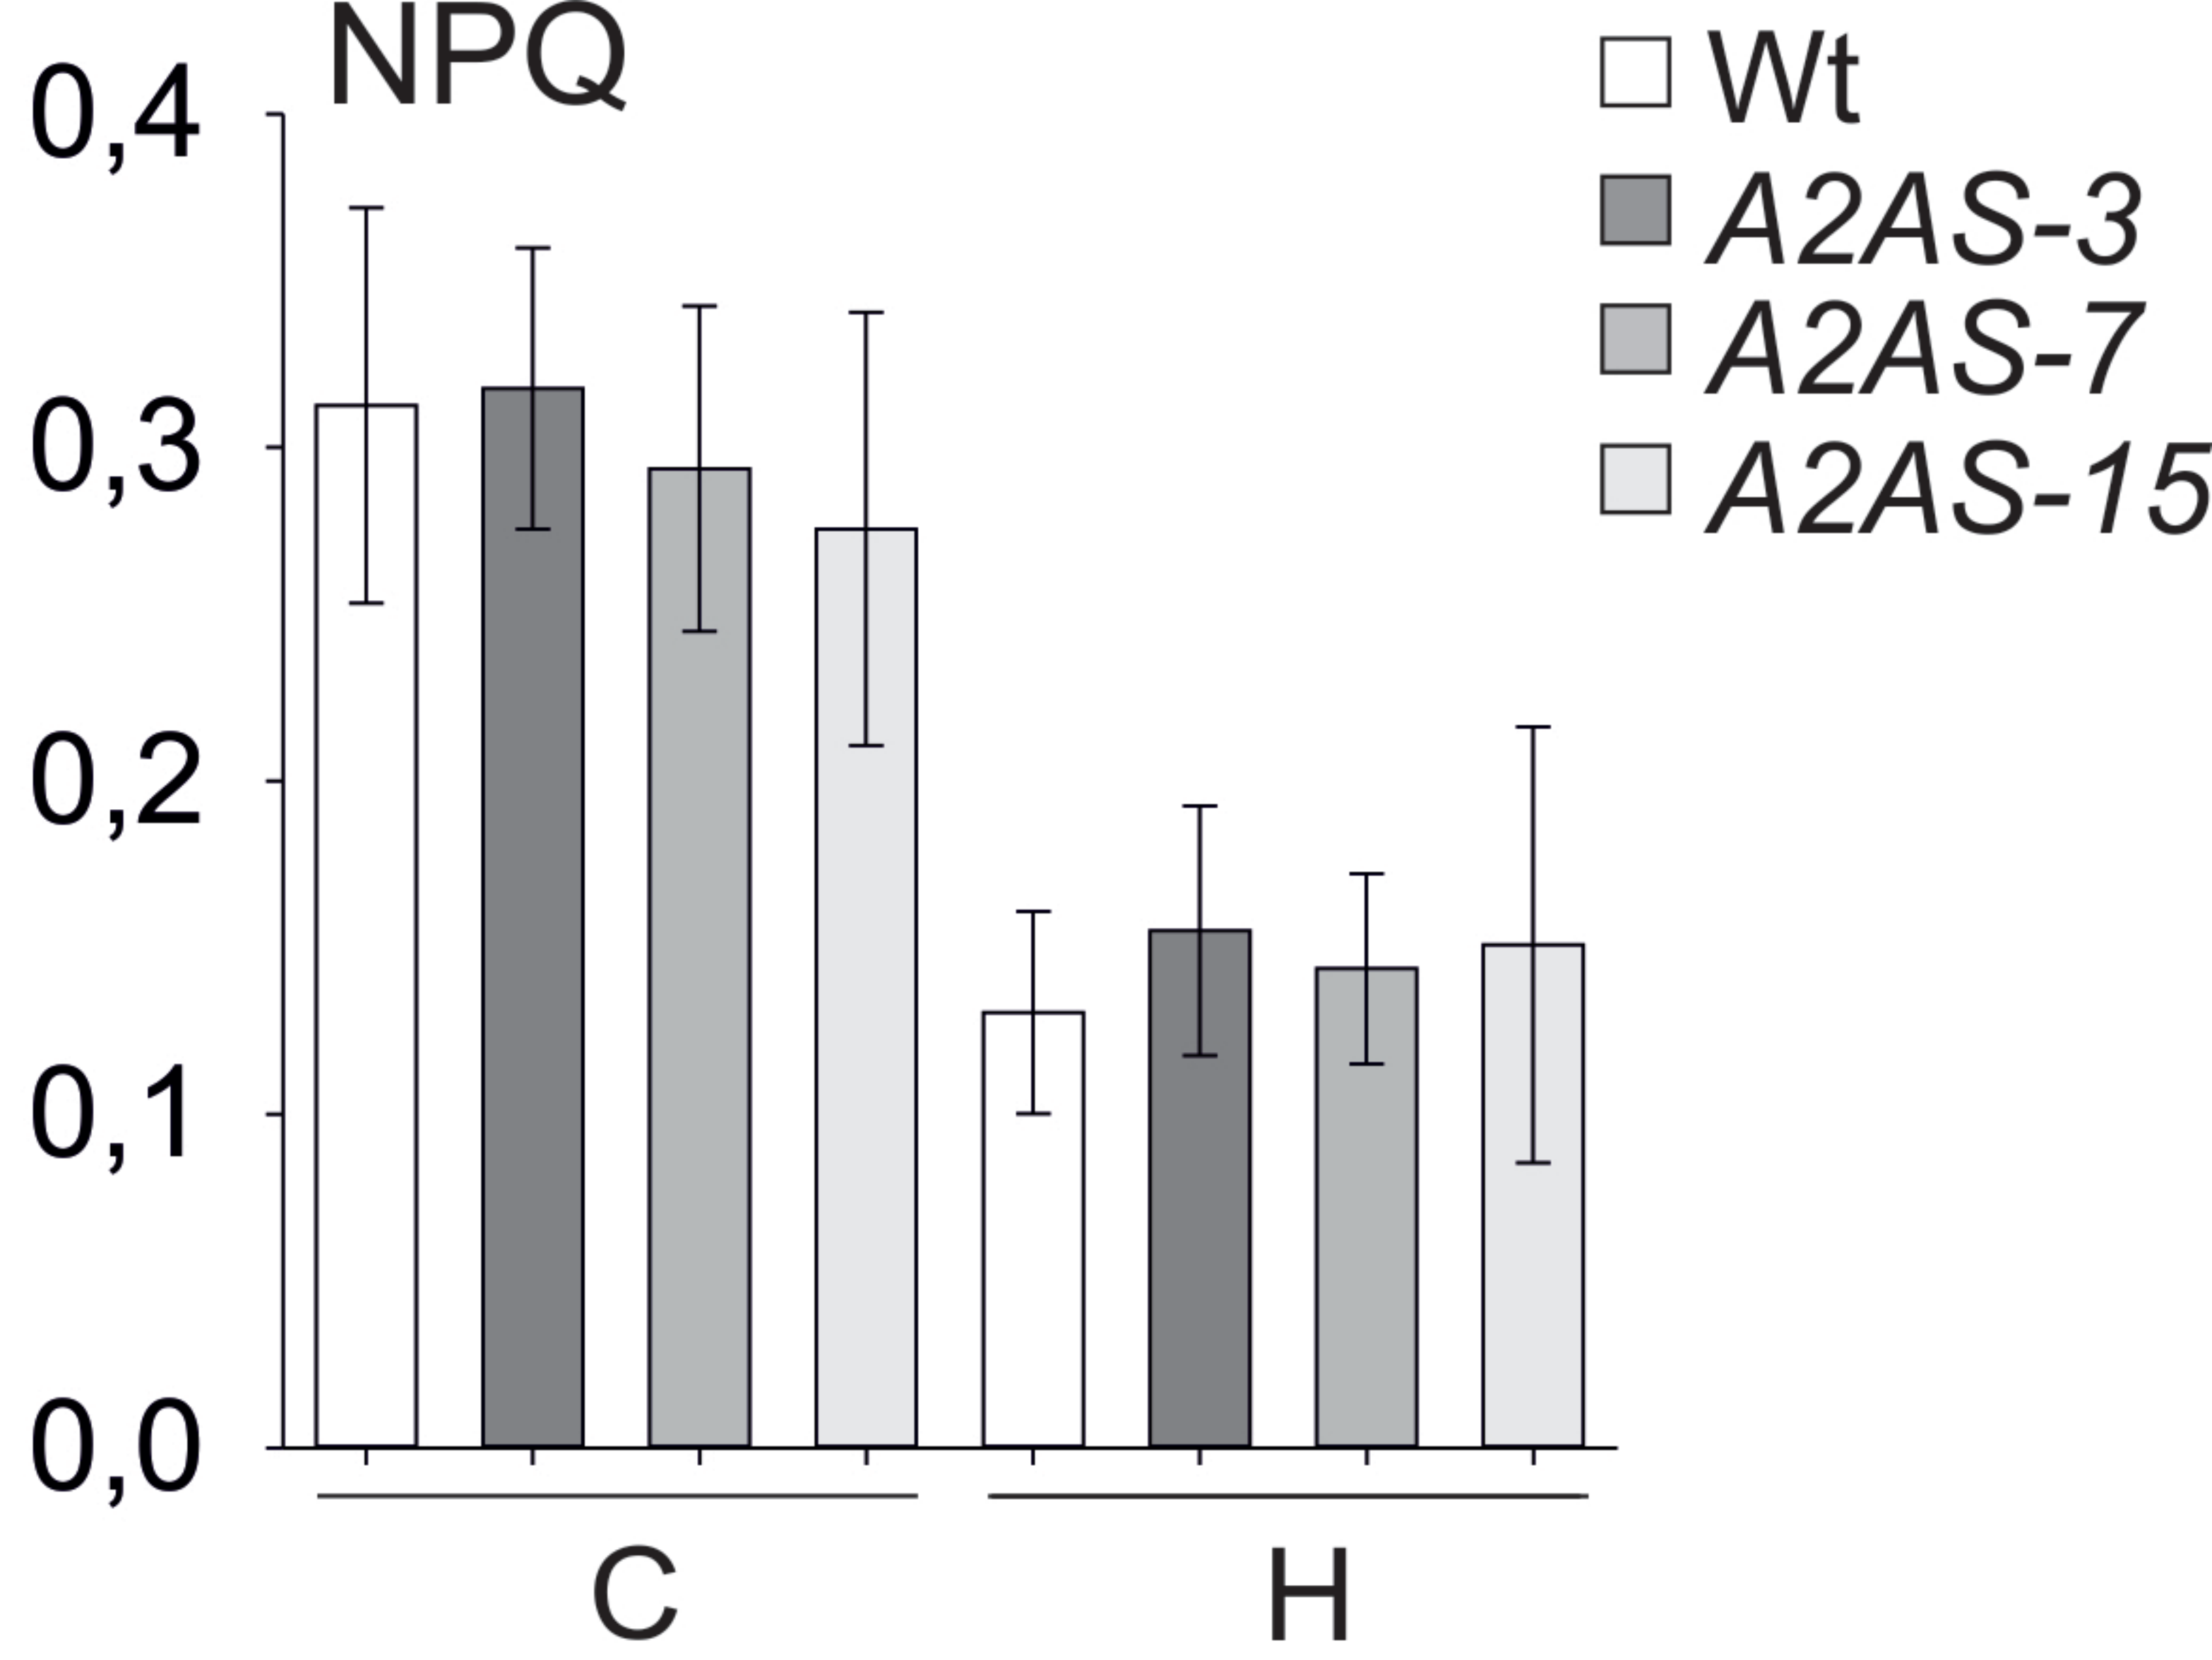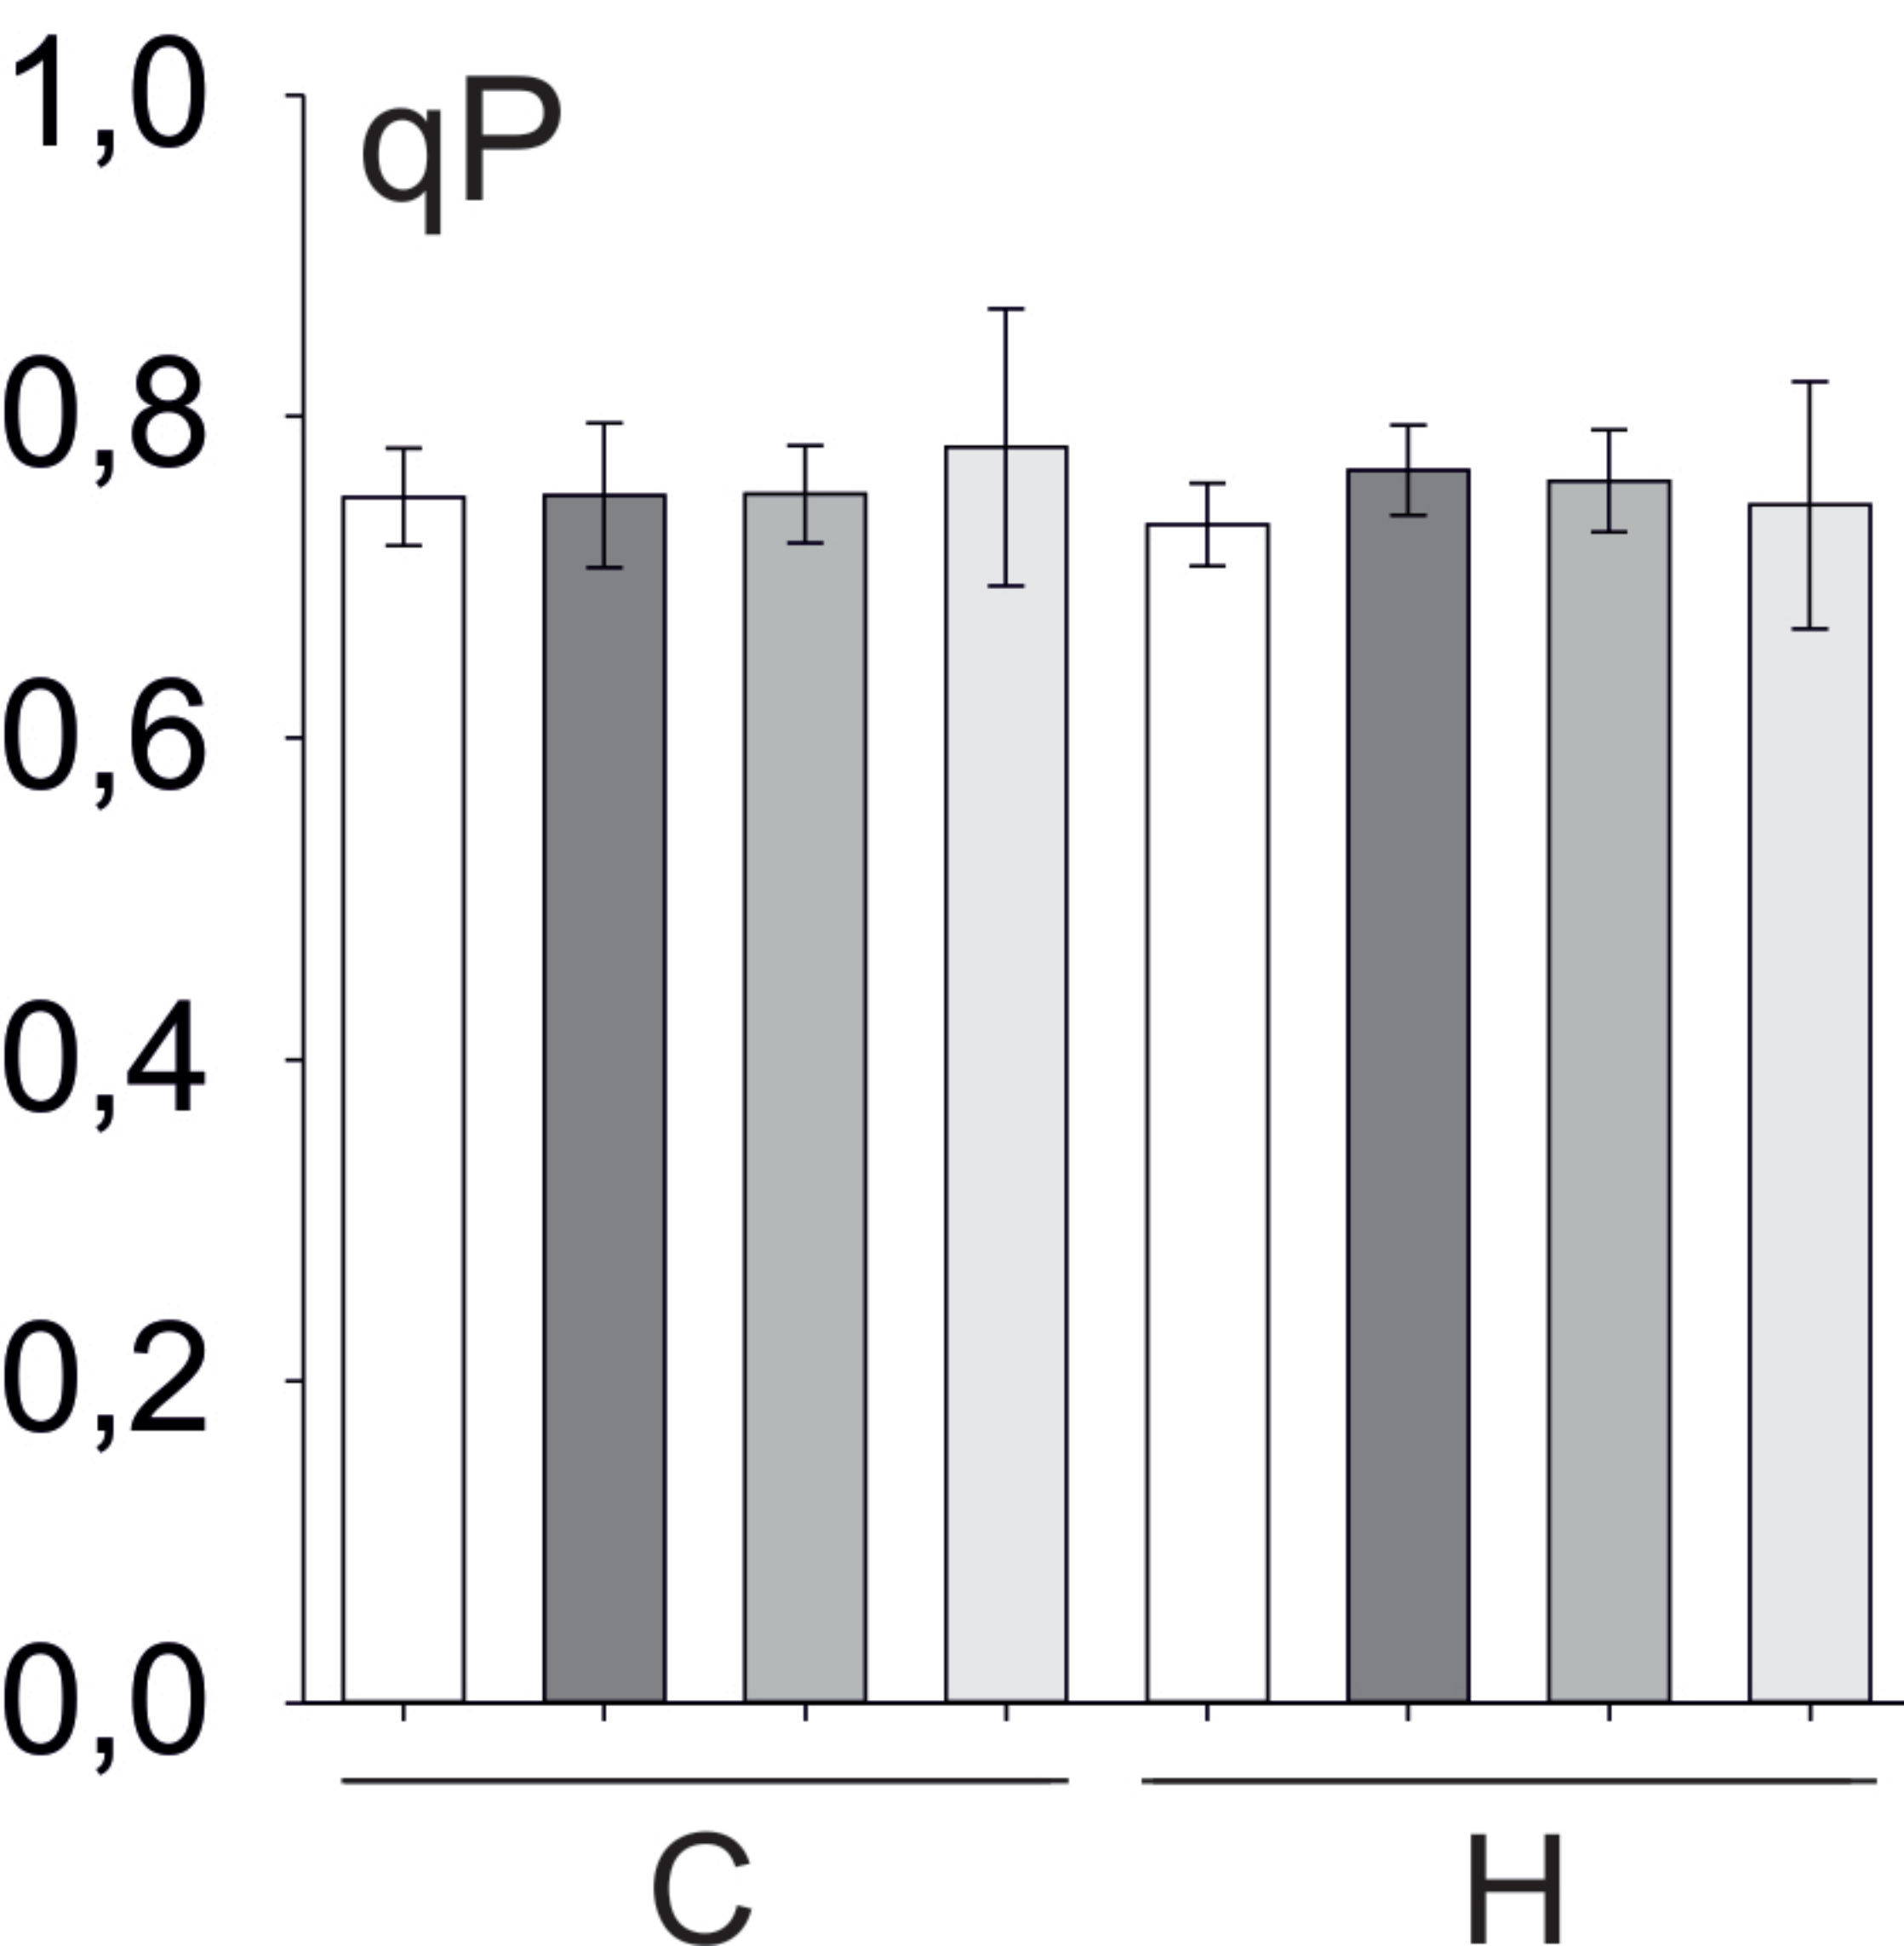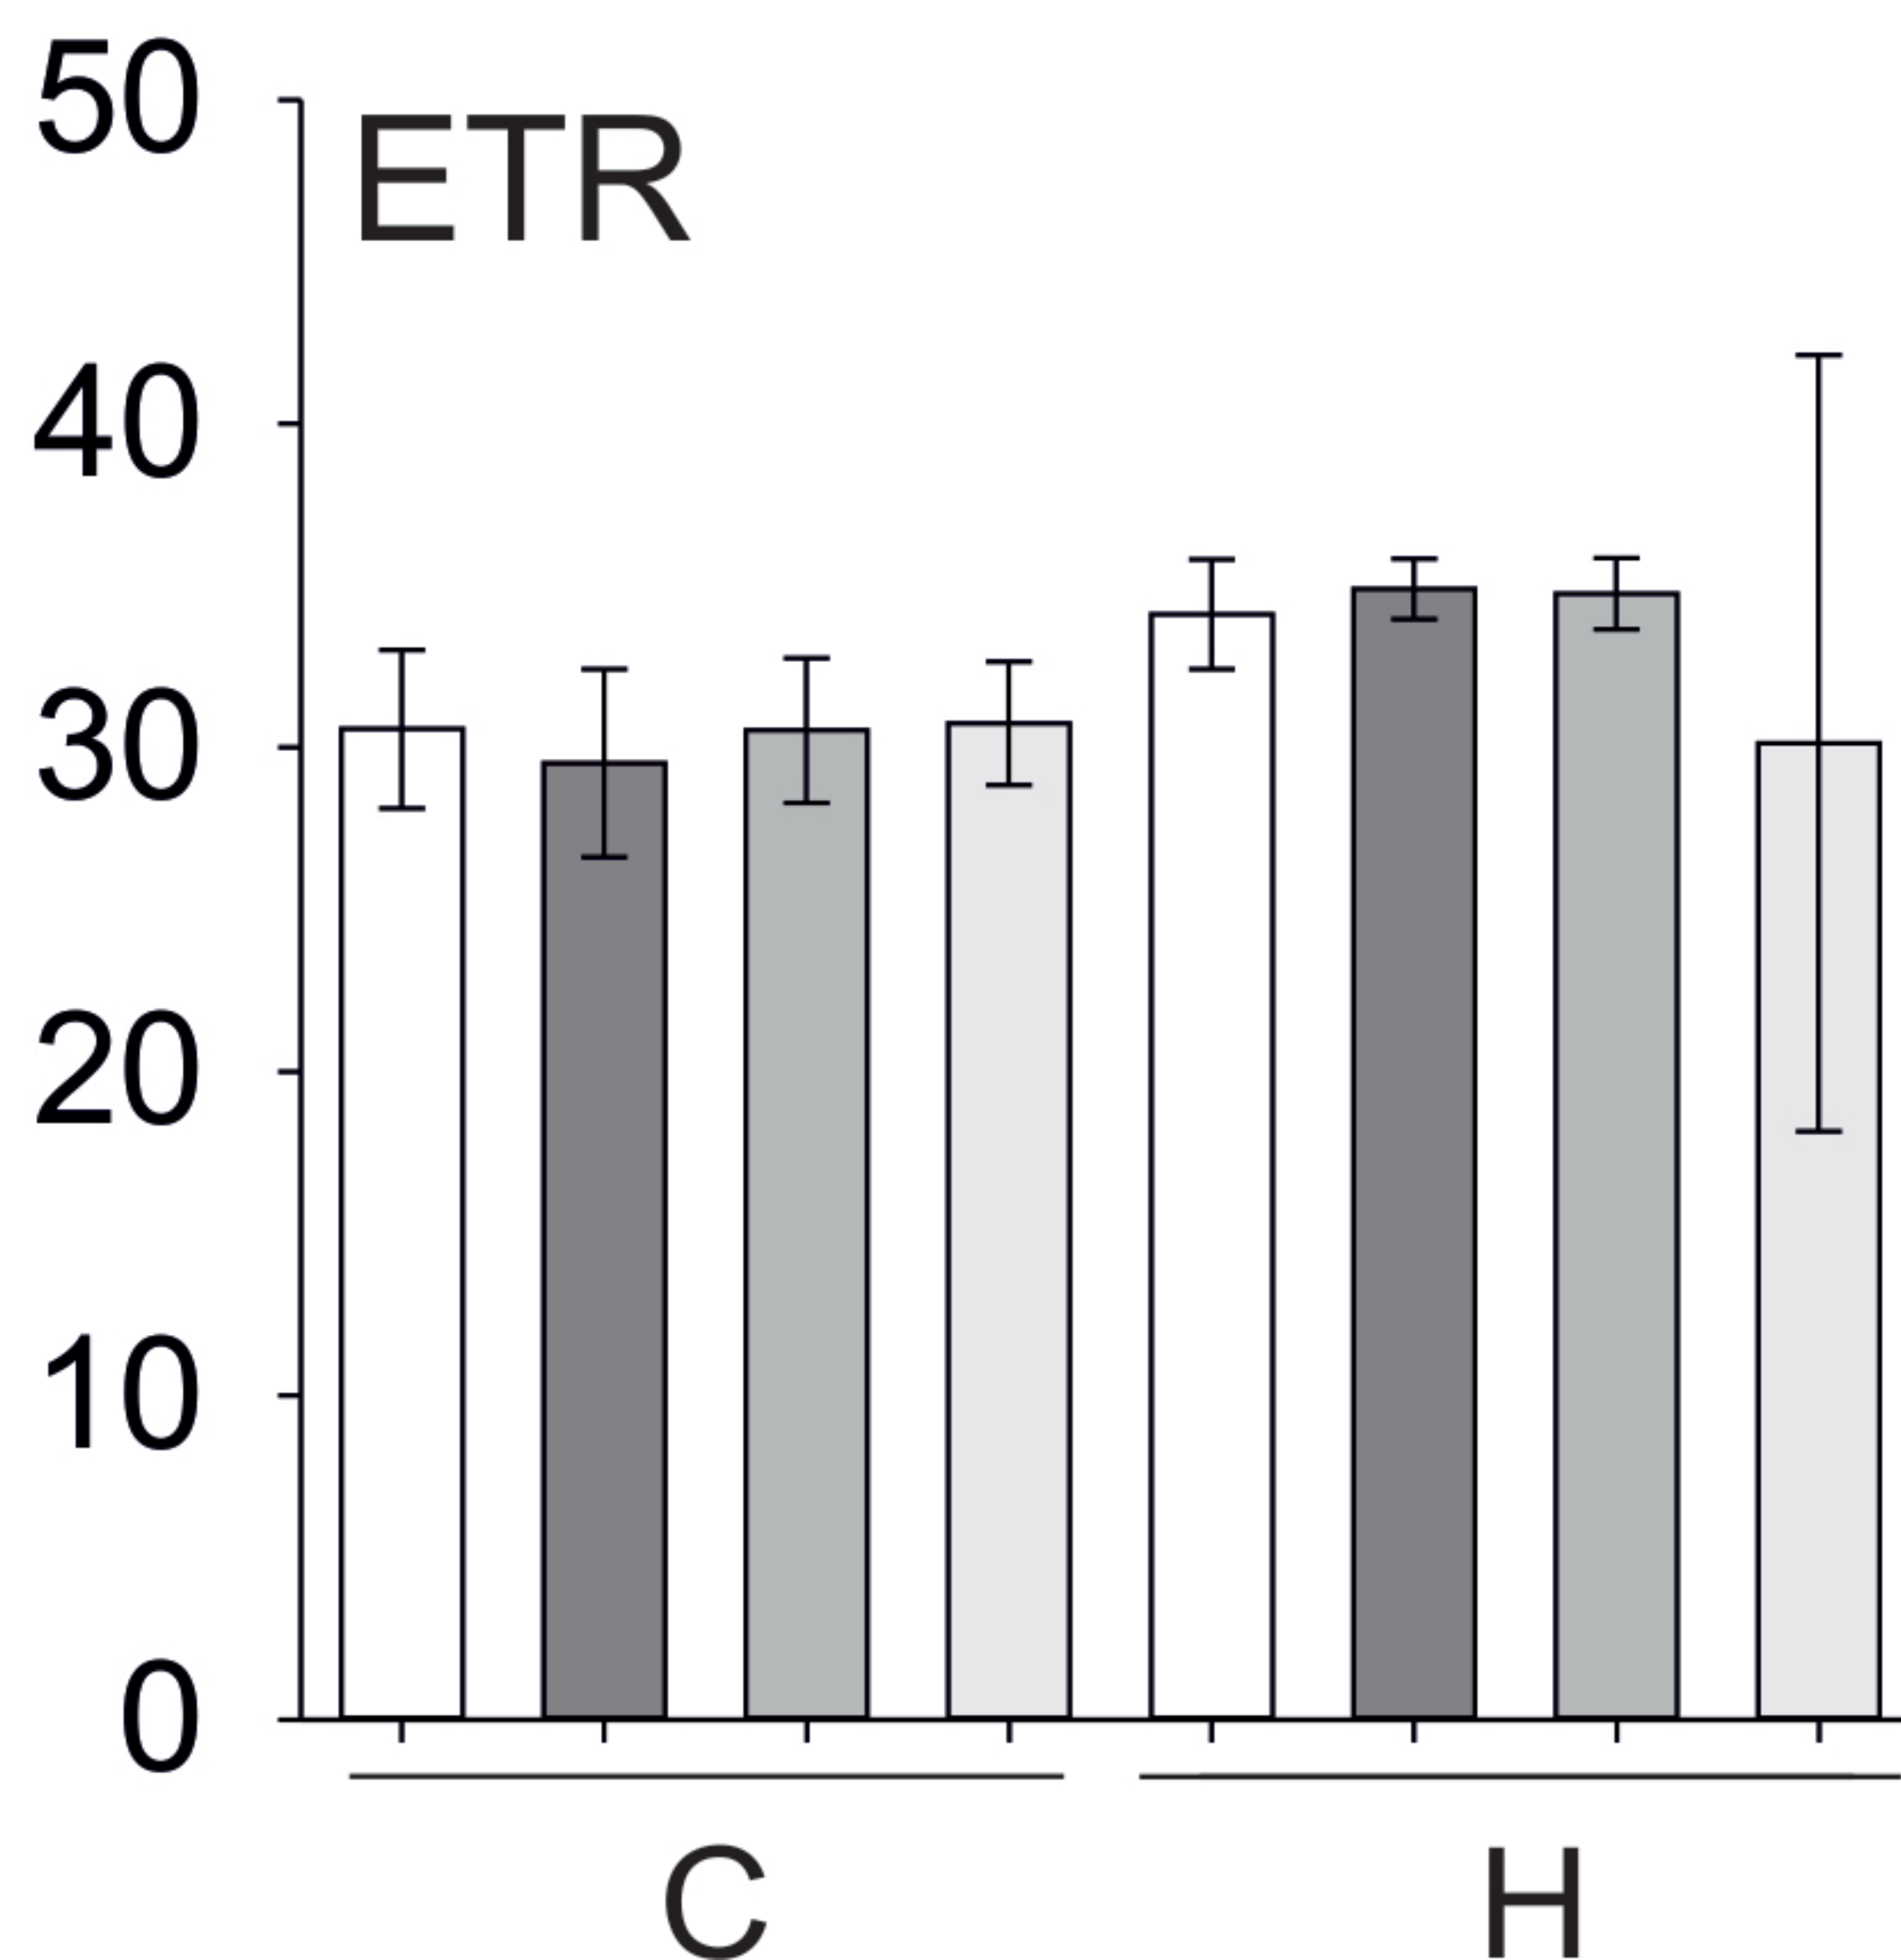

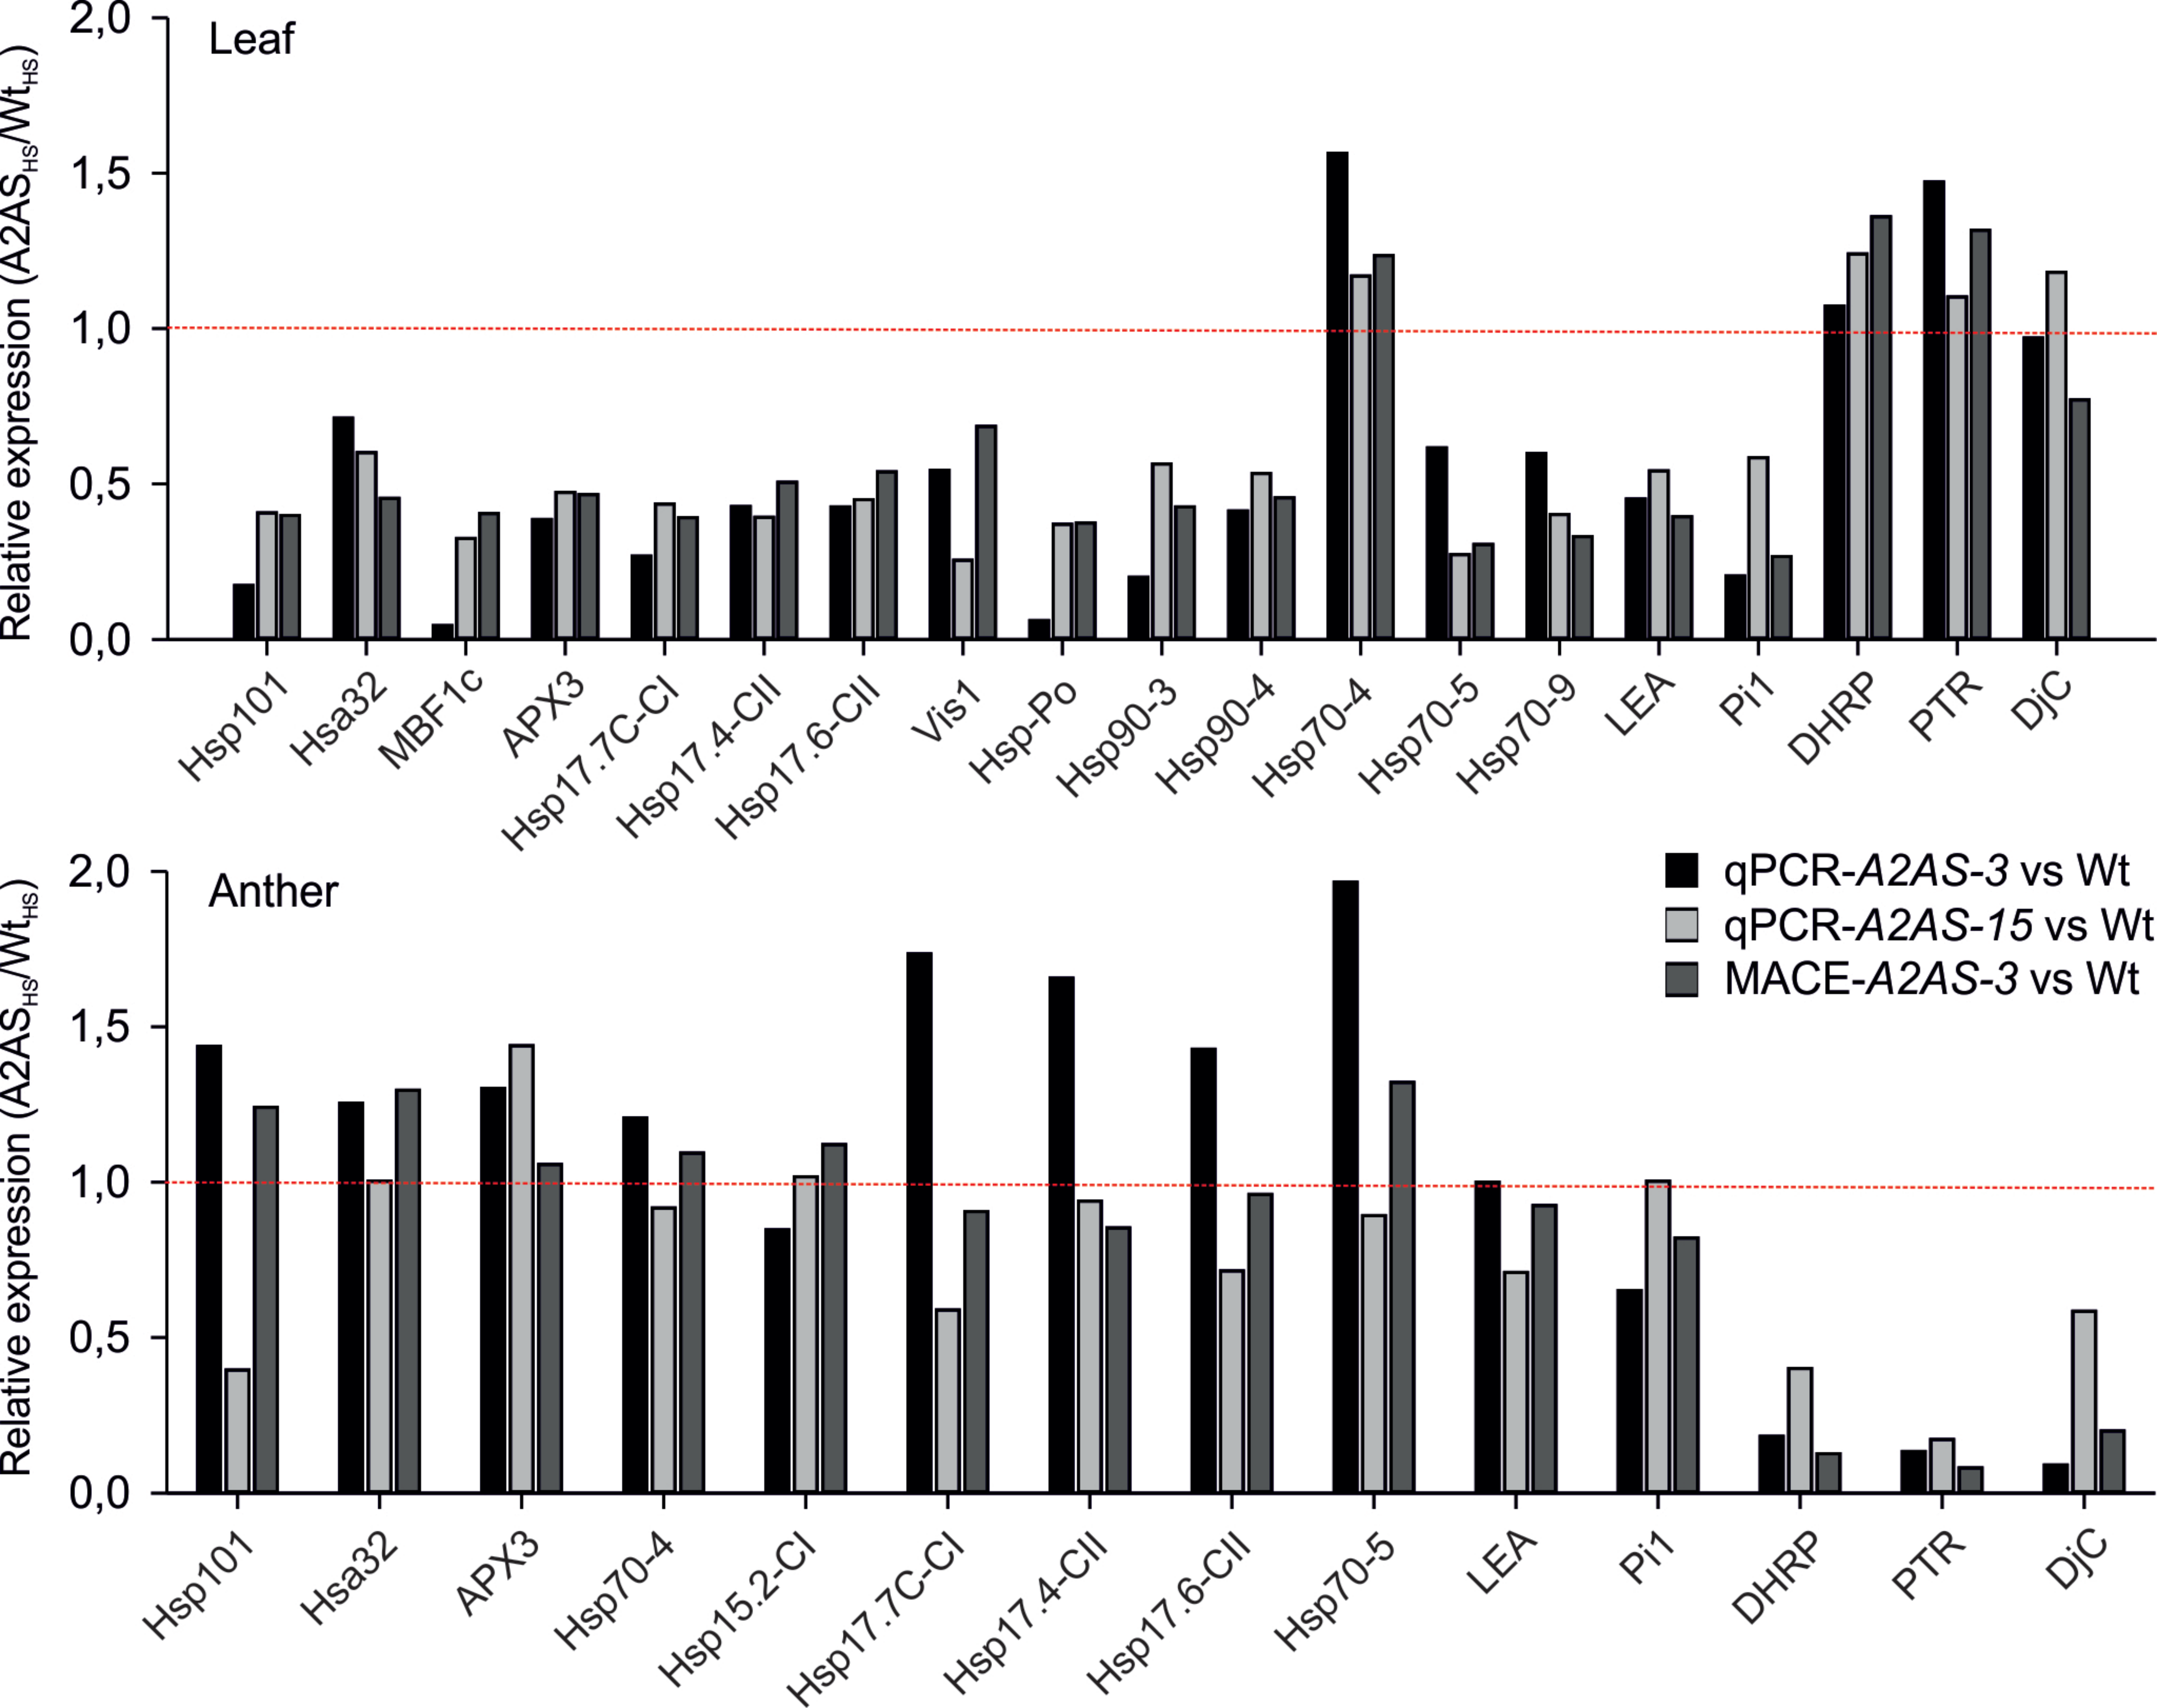

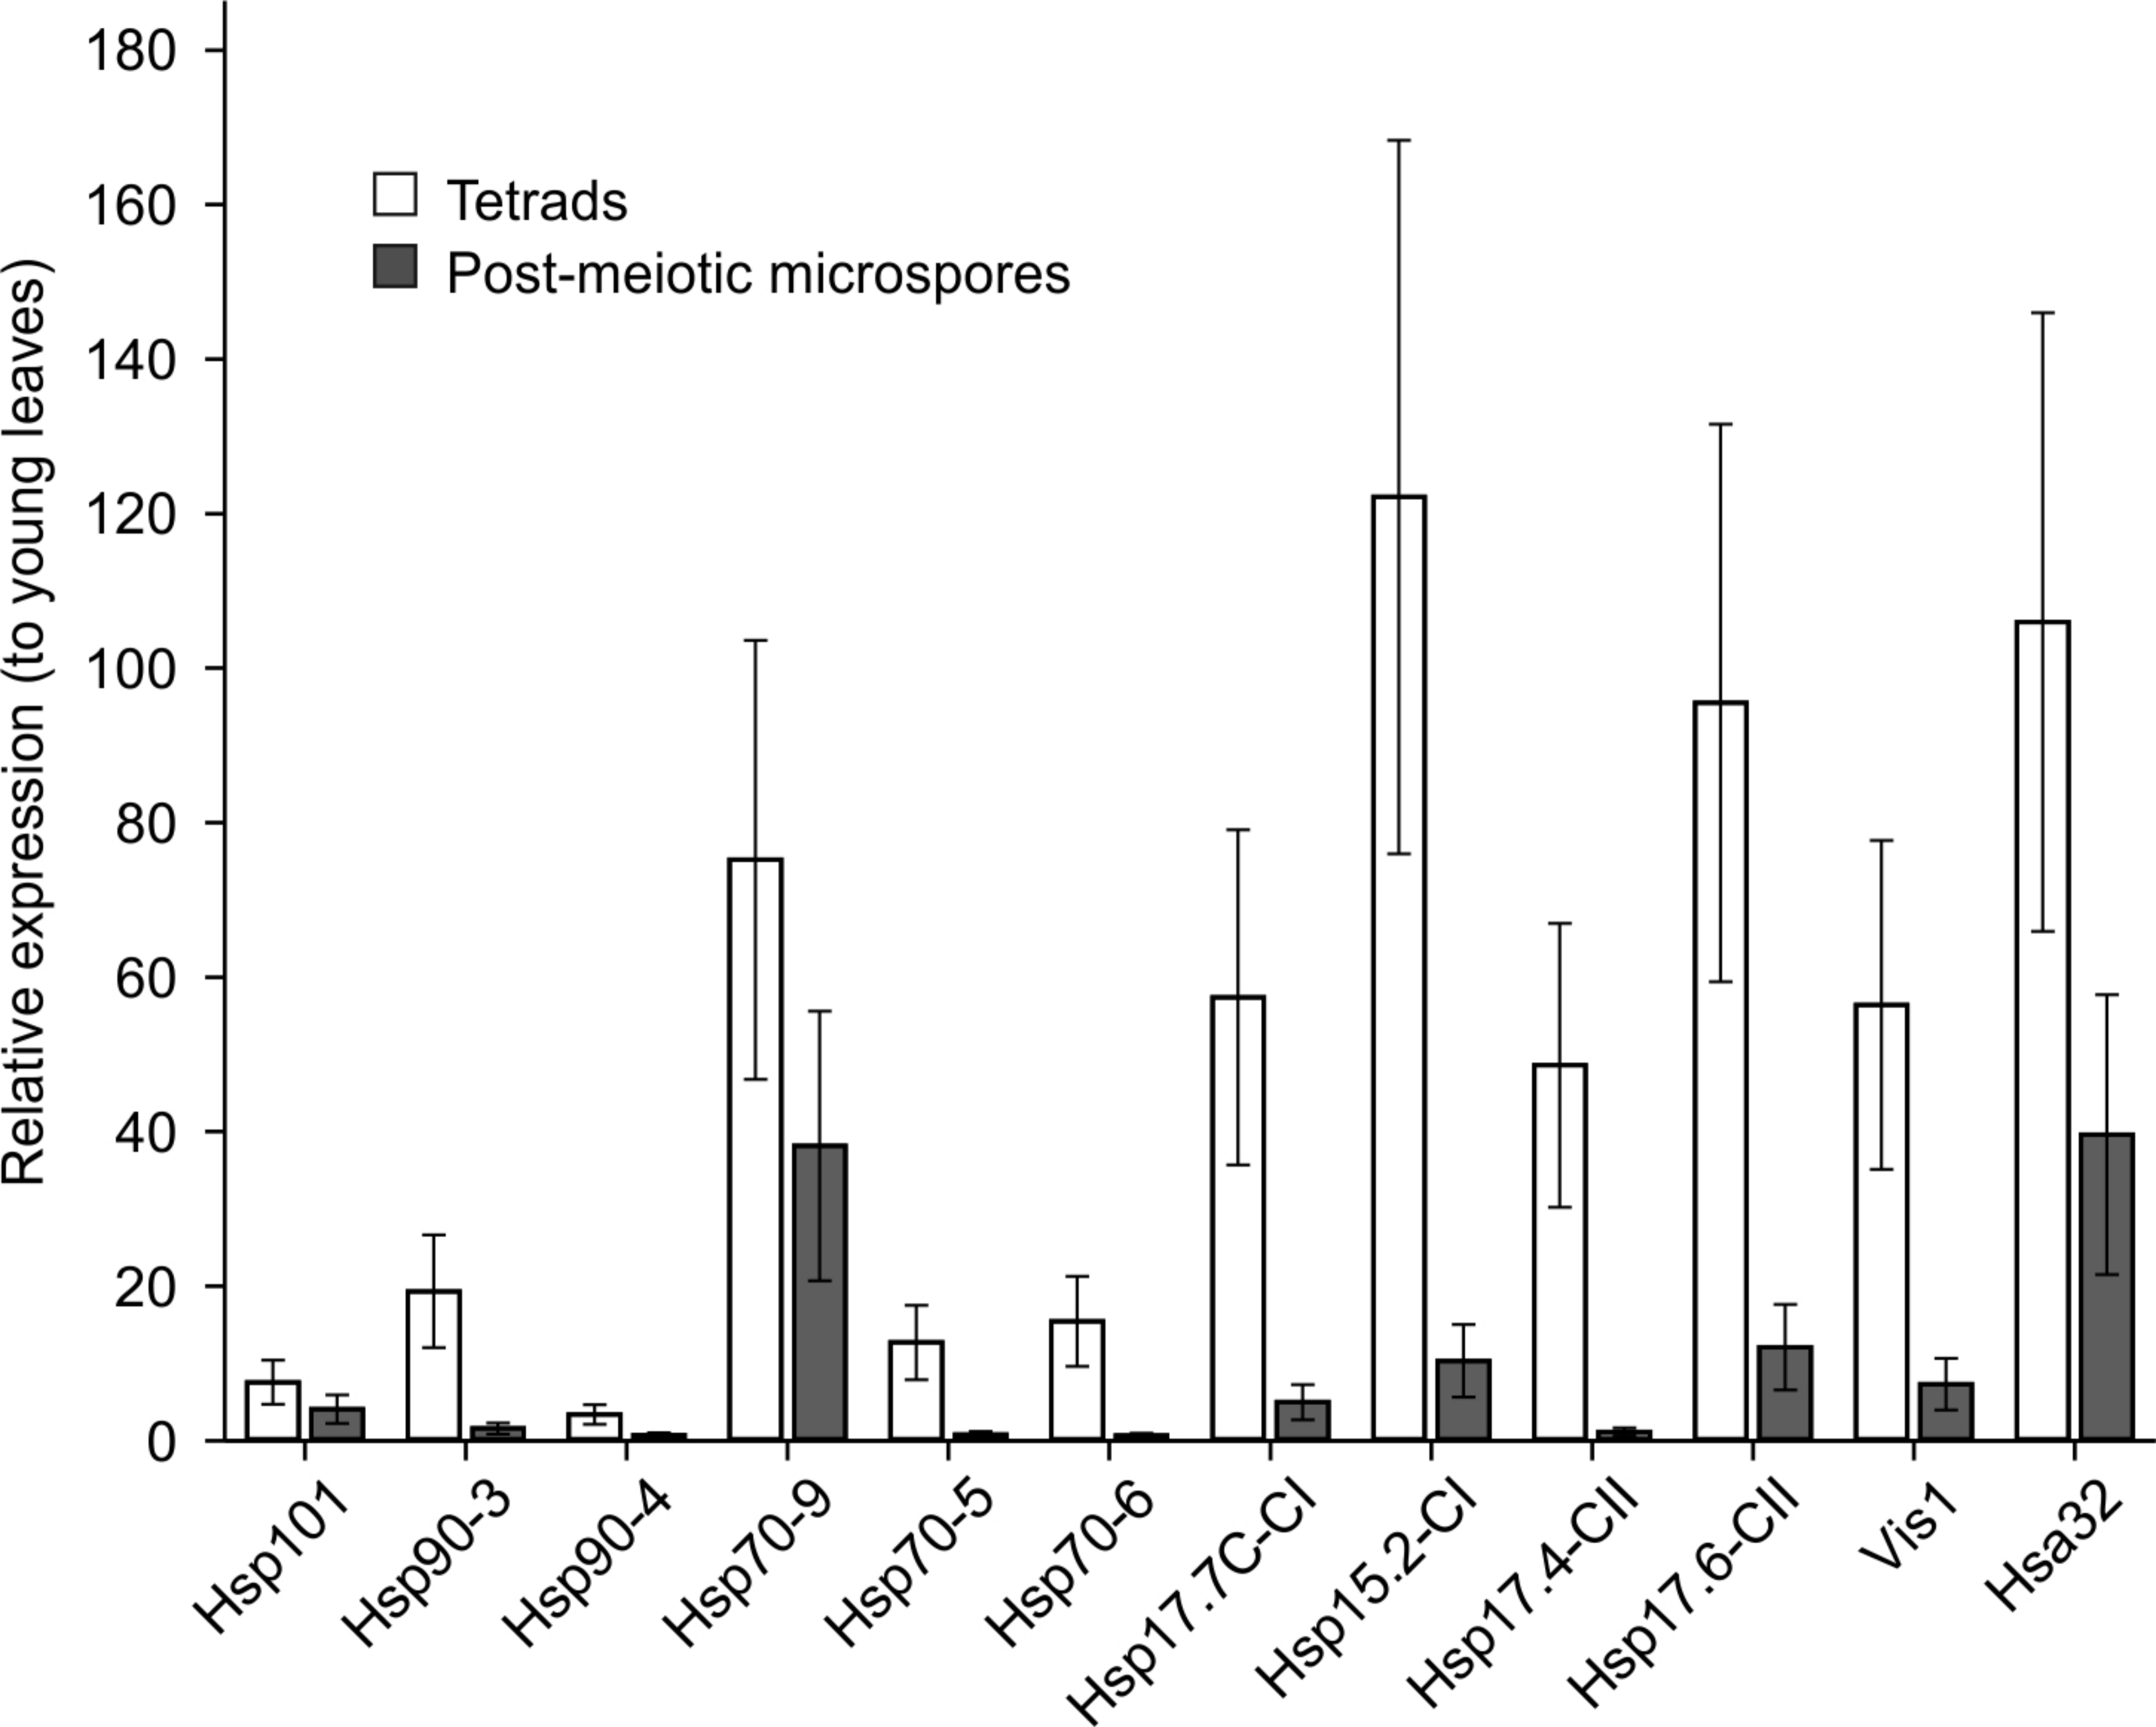



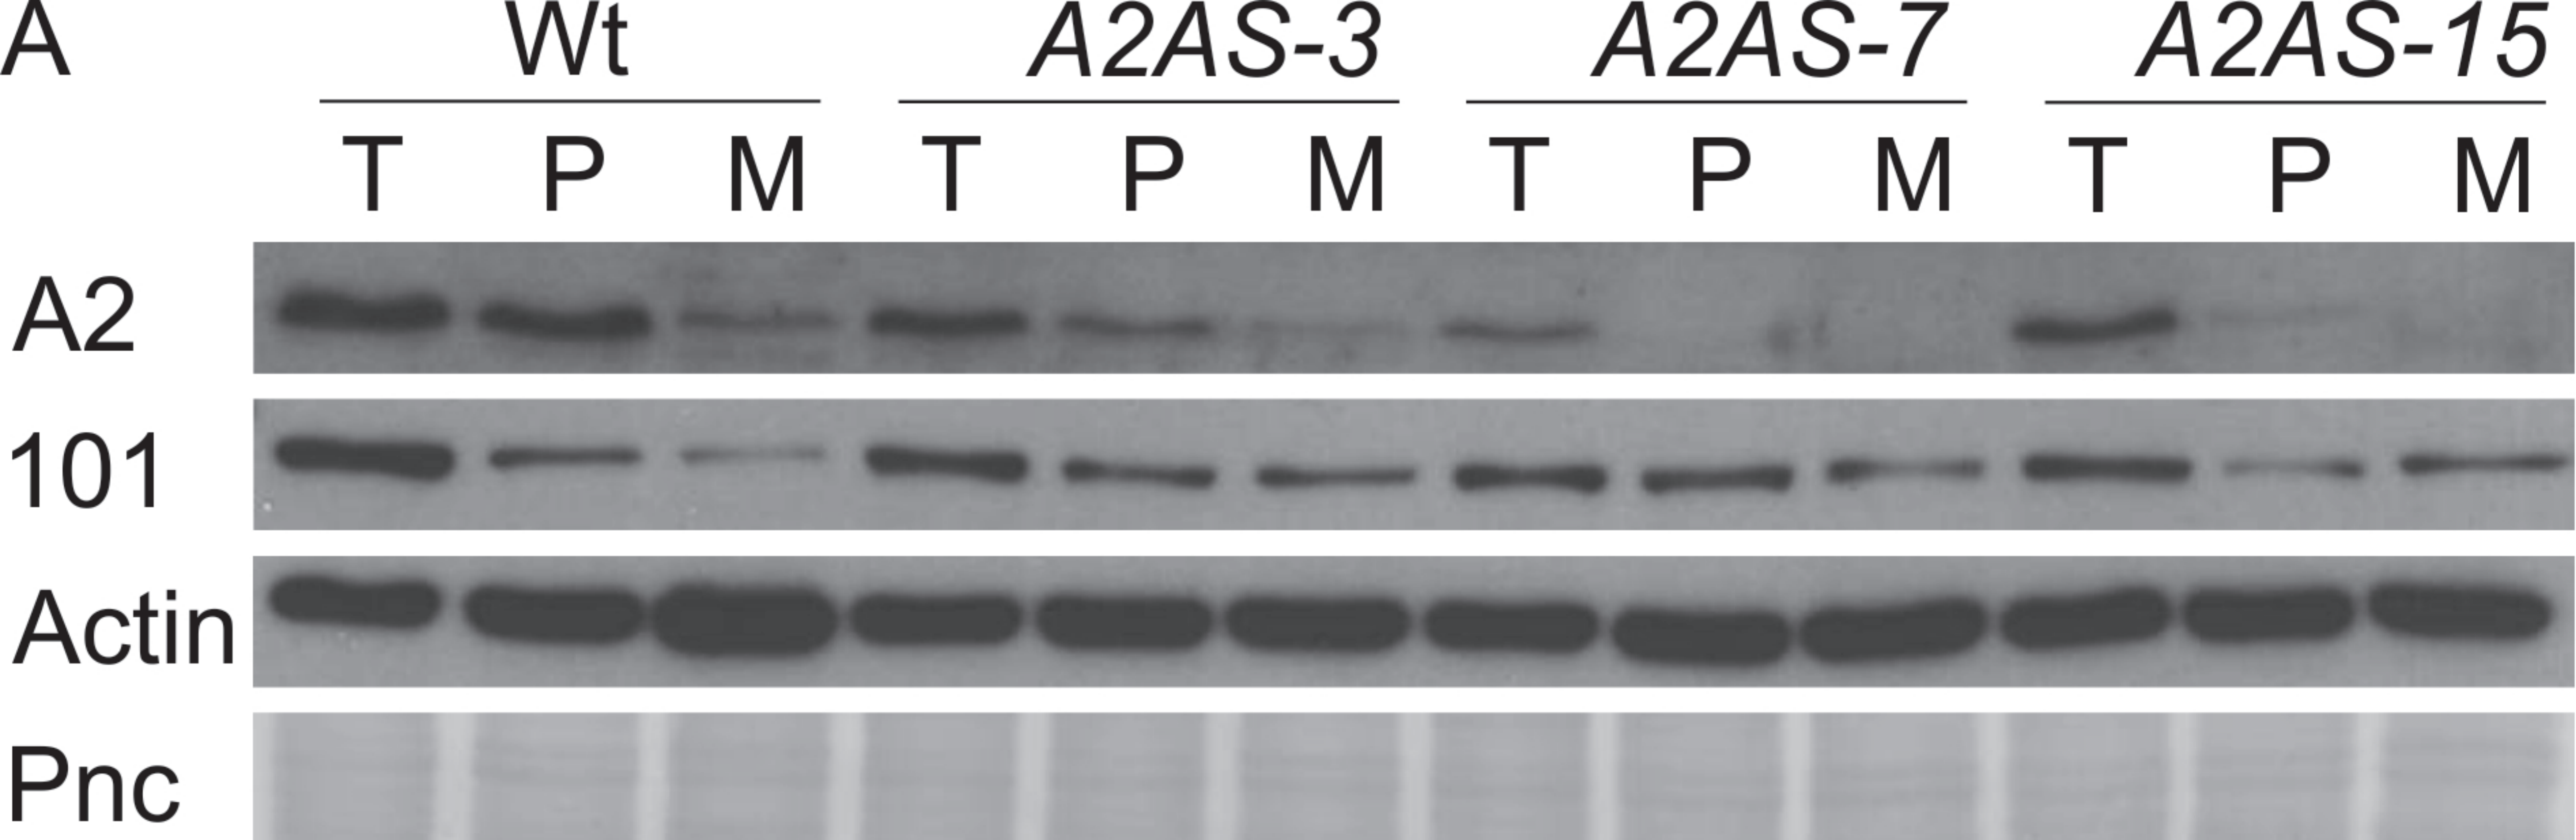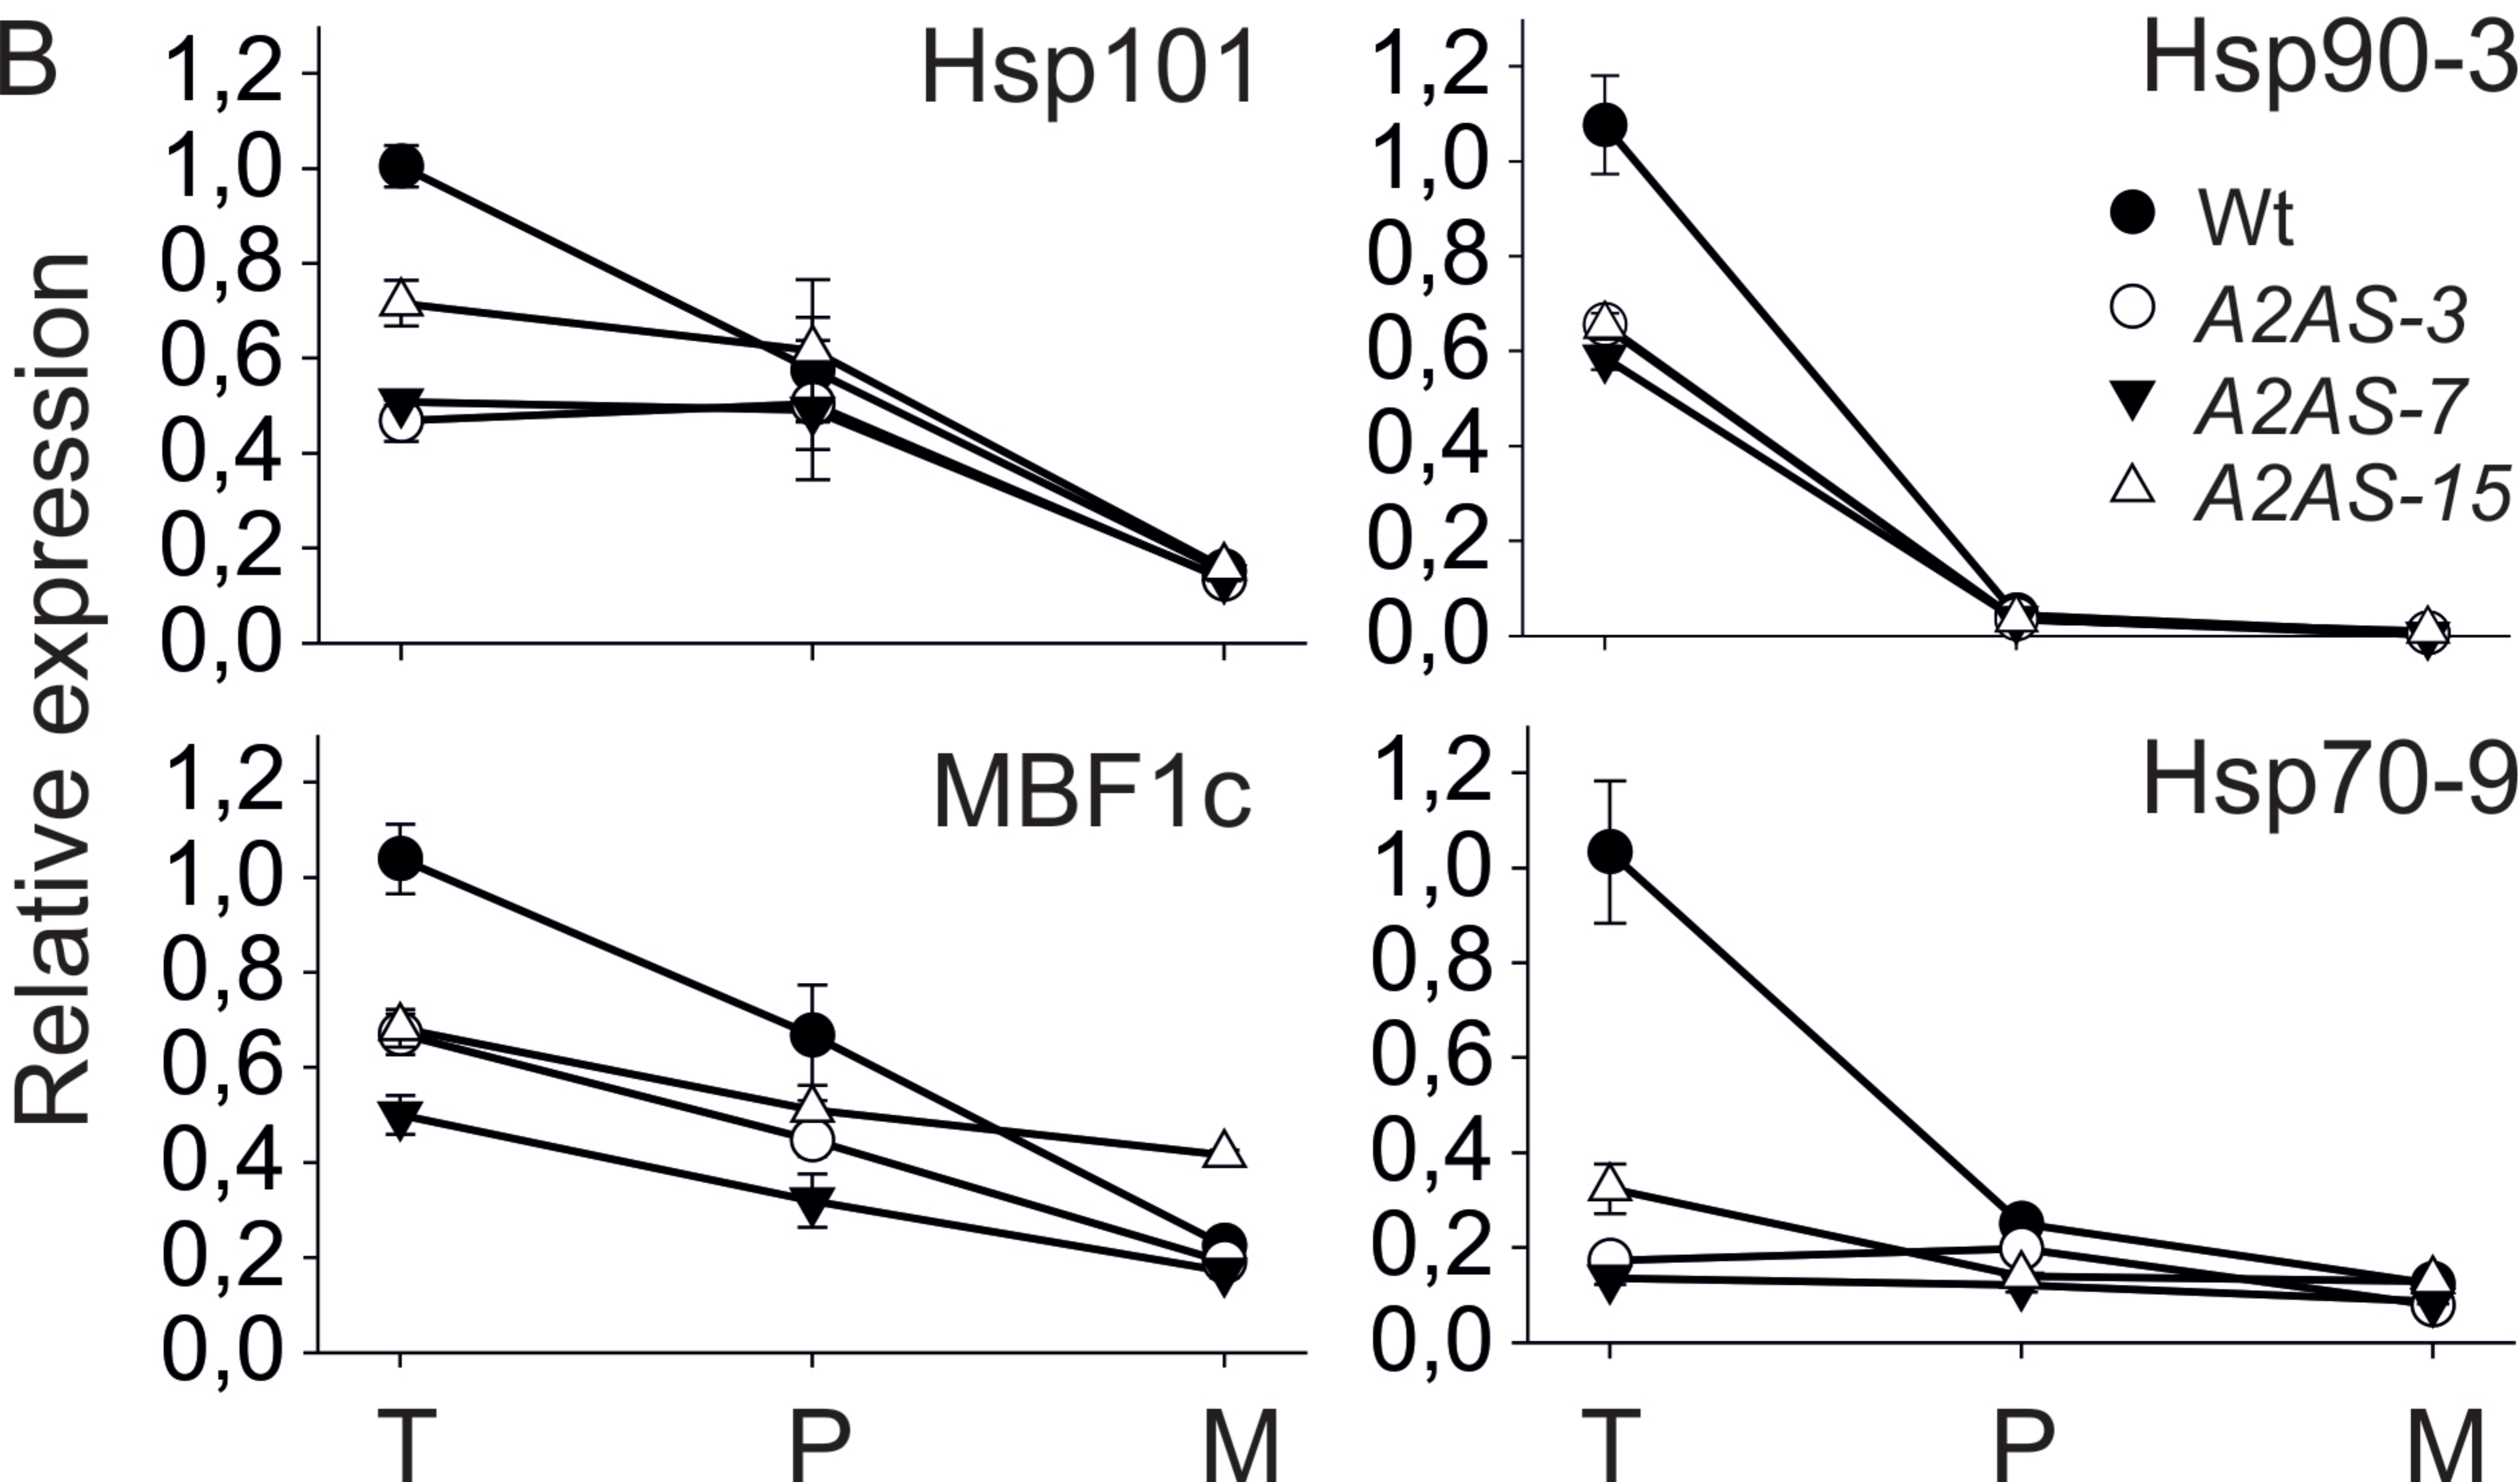

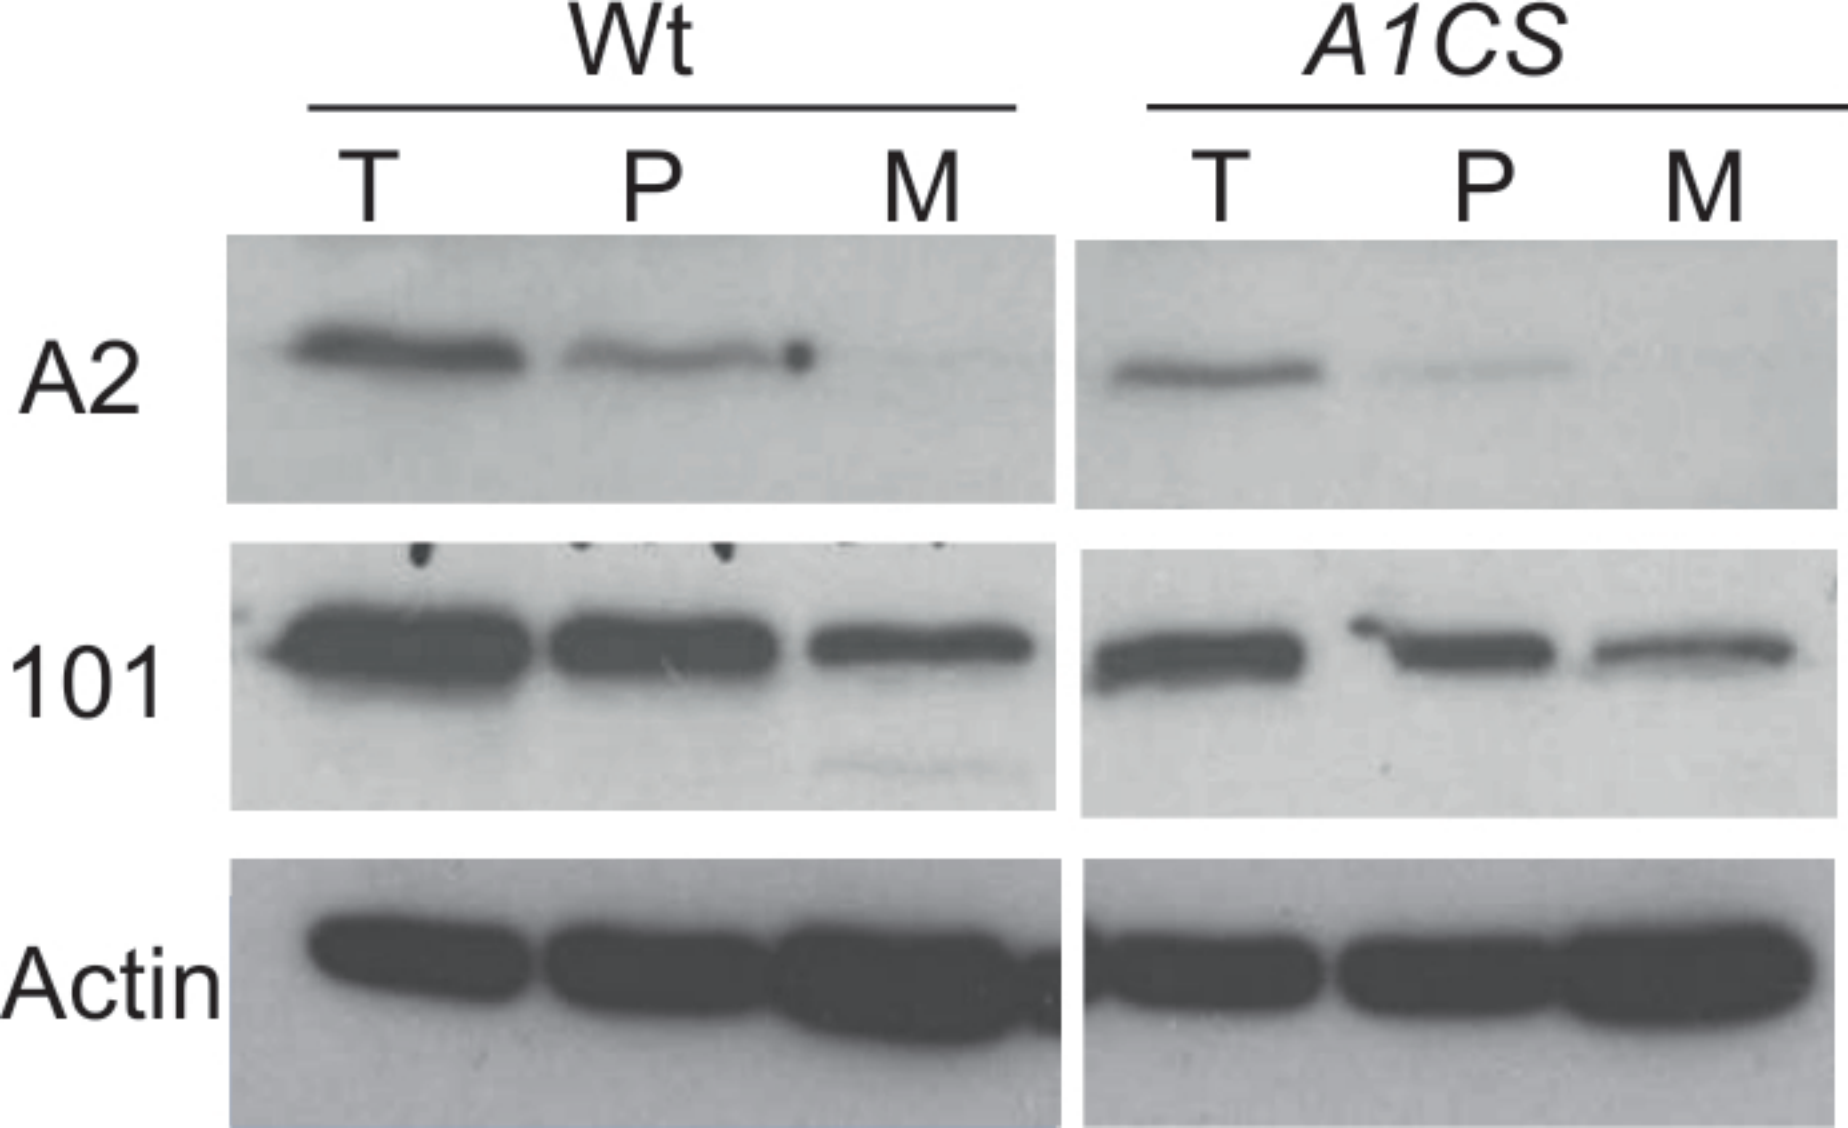

- 1 Supplementary Table 1. Overview of characteristics of the analyzed MACE libraries prepared from young leaves and anthers of control and heat-stressed
- 2 tomato wild type and A2AS plants.

| Library       | Library size | Number of mapped reads | Percentage of mapped reads | Hits on Watson strand | Hits on Crick strand |
|---------------|--------------|------------------------|----------------------------|-----------------------|----------------------|
| Leaf-Wt-C     | 11762204     | 11534512               | 98%                        | 6235294               | 5299286              |
| Leaf-Wt-R     | 14138812     | 13857252               | 98%                        | 7301121               | 6556250              |
| Leaf-A2AS-C   | 14052392     | 13796178               | 98%                        | 7512194               | 6284129              |
| Leaf-A2AS-R   | 6373703      | 6243965                | 97%                        | 3383705               | 2860335              |
| Anther-Wt-C   | 12687296     | 12411606               | 97%                        | 6368089               | 6043673              |
| Anther-Wt-R   | 14057885     | 13722325               | 97%                        | 7081546               | 6640933              |
| Anther-A2AS-C | 15100696     | 14764187               | 97%                        | 7473804               | 7290539              |
| Anther-A2AS-R | 14921347     | 14580174               | 97%                        | 7535237               | 7045093              |



1 **Supplemental Table 7.** List of primers used for qRT-PCR analysis.

| Gene name                   | Accession number  | Forward primer (5'->3') | Reverse primer (5'->3')    |
|-----------------------------|-------------------|-------------------------|----------------------------|
| EF1a                        | Solyc06g005060    | GGAAGCTTGAGAAGGAGCCTAAG | CAACACCCACAGCAACAGTTT      |
| UBI                         | Solyc07g064130    | GGACGGACGTAAGTCTAGCTGAT | AGCTTTCGACCTCAAGGGTA       |
| HsfA1a                      | Solyc08g005170    | GGGATAAATGAGGCAGCAAA    | TTGACCTGCAATTGCTGAAG       |
| HsfA1b                      | Solyc03g097120    | GAAAGCTTGCCTGACGCAGG    | GGTCCGATATGATAGATAGTG      |
| HsfA2                       | Solyc08g062960    | TTCCACCACATTGTTGCCTA    | GCAAGCACCAGATCCTTGT        |
| HsfA3                       | Solyc09g009100    | GCCCCGAGTACTTTGCCTCTT   | CTATCCCATAACTCGGCACCAG     |
| HsfA6b                      | Solyc06g053960/50 | CACAAGTCAAGCTATGGAGC    | GCTTCTTCAAGTTGTTTCC        |
| HsfA7                       | Solyc09g065660    | GCTTCTTTTATCCATGGTGTCC  | CTTGAACCTGGAAACTCTTC       |
| Hsp101                      | Solyc03g115230    | GTGGCAAGTGTACCATGGAGA   | GACTTGCTCAACTGCTCGT        |
| Hsp15.2-CI                  | Solyc09g015000    | TTGGAAAGAGACCCCACAAG    | TTGAAGTTACCGCTGCTCTT       |
| Hsp17.4-CII                 | Solyc08g062340    | GTCGCAGCCATTGCCTTAGC    | ACCACTCTTCCACACTTTCAGC     |
| Hsp17.6-CII                 | Solyc08g062450    | GATGGAGAGAAGGGTTGGGAA   | AATTGTTTTGGGTTTCTTTGGC     |
| Hsp17.7C-CI                 | Solyc06g076520    | ATGGAGAGAAGCAGCGGTAA    | ATGTCAATGGCCTTCACTC        |
| Hsp21.5-ER                  | Solyc11g020330    | ACTAAGCGCAGATGGGTCAT    | CGCGAGCAGAGTGTTTTCTA       |
| Hsp70-1                     | Solyc06g076020    | GCTCGAGGGCATCTGTAATC    | GAAACCAACTAGTATCTTTATCAACC |
| Hsp70-4                     | Solyc09g010630    | AAGATTGAGGAGGCCATTGA    | CCATCATCACCCATGTCAG        |
| Hsp70-5                     | Solyc04g011440    | GGAAGTGGACTAAGCTCCACA   | CGAAGGATATTTCTACATACACAAA  |
| Hsp70-6                     | Solyc11g066100    | GACAGCAACCAACTTGCAGA    | CCTGCACCACCACCAACAGAAGG    |
| Hsp70-9                     | Solyc11g020040    | GAGCTCAAGGATGCCATTTT    | CAGATGATCCAGTTGTACCAG      |
| Hsp90-3                     | Solyc06g036290    | TTCTTGGTGACAAGGTCGAA    | ATCAGGATTAATTTCCATCGTCT    |
| Hsp90-4                     | Solyc03g007890    | TGACCCGAATACATTTGCTG    | ACCGCATATAGATGACGCAT       |
| Vis1                        | Solyc05g014280    | GGGATAGGTTTCCAACAGCA    | TGATCTCCCATGGTGTCTT        |
| Hsp16.1-Po                  | Solyc04g014480    | CCAGCTCTTCTCGATTGGAT    | TACCGTGAATTCTGCTCTT        |
| Hsa32                       | Solyc02g079930    | AAGATTGTGGGTCTGCTTGG    | CTGAGGCATTCCAGATCCAT       |
| LEA                         | Solyc06g009140    | ATTTCTTCCGCTGCAACTTC    | TATCCACGCCTCTGGATAGC       |
| MBF1c                       | Solyc01g104740    | GTGGGTGTAAGGCAAGCAAT    | CTATGGCCTTTCCATTTCCA       |
| APX3                        | Solyc09g007270    | CCGCCCTCTAGTCGAGAAAT    | AGAACCAGACTGATCTCCAGAGA    |
| DjC                         | Solyc07g053620    | CCGGATAAGAACCACAAAA     | CTTGAGCCCTTCTTACCAT        |
| Desiccation-related protein | Solyc01g099570    | CAGAGAAGGGAGTGGGAGTG    | TAGGAGGTGGCCAGACATA        |
| DHRP                        | Solyc06g035790    | CCGGCAGCAGCAGCGTCT      | TTGATGTCGAAACAGGGT         |
| Pectate lyase               | Solyc05g007080    | AACCCACCATCATTAGCCA     | CCATTGCCAGTTTCTCCACA       |
| Pectinacetylase             | Solyc12g005320    | CCTAGCTGGCAGTTCTGC      | GCGGCAACTCTGAAAATCTC       |
| Pectinacetylase             | Solyc03g078260    | AGTGGAAGTTCTGCAGGAGG    | AGGCTCCTTGGGGTTGATAA       |
| Pectinesterase              | Solyc01g066360    | GCAACAAGAAGTATGCTGATGG  | TCTTGTCTGCTGATACACGGA      |
| Pil                         | Solyc01g097270    | GACAAATCGATACAGATGGAGTG | CTCATTCTCTGTCAACAACAGATAGC |
| SISTP11                     | Solyc06g054270    | TGGTGTGGTGTGGTTTCG      | GTTGGGGTGCATGTTTCAT        |
| PTR                         | Solyc06g050900    | TTTCACTACGGGAAACGAC     | GGCCATTCTGTGATCAACT        |

2

3

4
